# Supplementary material for: Differential gene expression signatures for cell wall integrity found in chitin synthase II (chs2Δ) and myosin II (myo1Δ) deficient cytokinesis mutants of Saccharomyces cerevisiae
Source: PubMed Central journal article supplement (PMC2684100; doi:10.1186/1756-0500-2-87), 2009-05-09
Supplement: 1756-0500-2-87-S1.pdf [file 1756-0500-2-87-S1.pdf]

| YORF                                    | Gene          | Description                                                                                                                                                                                                                              | Fold change <i>myo1</i> Δ | Fold change <i>chs2</i> Δ |
|-----------------------------------------|---------------|------------------------------------------------------------------------------------------------------------------------------------------------------------------------------------------------------------------------------------------|---------------------------|---------------------------|
| <b>Cell organization and biogenesis</b> |               |                                                                                                                                                                                                                                          |                           |                           |
| YDL014W                                 | <i>NOPI</i>   | Nop1p Nucleolar protein, component of the small subunit processome complex, which is required for processing of pre-18S rRNA; has similarity to mammalian fibrillarin; protein coding                                                    | -2.62                     | -2.04                     |
| YOL077C                                 | <i>BRX1</i>   | Brx1p Nucleolar protein, constituent of 66S pre-ribosomal particles; depletion leads to defects in rRNA processing and a block in the assembly of large ribosomal subunits; possesses a sigma(70)-like RNA-binding motif; protein coding | -2.08                     | -2.76                     |
| YDR465C                                 | <i>RMT2</i>   | Arginine methyltransferase; ribosomal protein L12 is a substrate Rmt2p; protein coding                                                                                                                                                   | -2.40                     | -3.86                     |
| YPL226W                                 | <i>NEW1</i>   | ATP binding cassette family member; Asn/Gln-rich rich region supports [NU+] prion formation, susceptibility to [PSI+] prion induction and aggregation of a fragment of the human Machado-Joseph Disease protein New1p; protein coding    | -2.34                     | -2.57                     |
| YKR076W                                 | <i>ECM4</i>   | Ecm4p Omega class glutathione transferase; not essential; similar to Ygr154cp; green fluorescent protein (GFP)-fusion protein localizes to the cytoplasm; protein coding                                                                 | 3.26                      | 2.13                      |
| YKR057W                                 | <i>RPS21A</i> | Protein component of the small (40S) ribosomal subunit; nearly identical to Rps21Bp and has similarity to rat S21 ribosomal protein Rps21ap; protein coding                                                                              | -2.32                     | -1.98                     |
| YDR418W                                 | <i>RPL12B</i> | Protein component of the large (60S) ribosomal subunit, nearly identical to Rpl12Ap; rpl12a rpl12b double mutant exhibits slow growth and slow translation; has similarity to E. coli L11 and rat L12 ribosomal                          | -3.28                     | -2.92                     |

|         |               |                                                                                                                                                                                                                                                               |       |       |
|---------|---------------|---------------------------------------------------------------------------------------------------------------------------------------------------------------------------------------------------------------------------------------------------------------|-------|-------|
|         |               | proteins Rpl12bp; protein coding                                                                                                                                                                                                                              |       |       |
| YOL004W | <i>SIN3</i>   | Component of the Sin3p-Rpd3p histone deacetylase complex, involved in transcriptional repression and activation of diverse processes, including mating-type switching and meiosis; involved in the maintenance of chromosomal integrity Sin3p; protein coding | 2.29  | -1.13 |
| YCL059C | <i>KRR1</i>   | Essential nucleolar protein required for the synthesis of 18S rRNA and for the assembly of 40S ribosomal subunit Krr1p; protein coding                                                                                                                        | -2.37 | -1.80 |
| YIL052C | <i>RPL34B</i> | Protein component of the large (60S) ribosomal subunit, nearly identical to Rpl34Ap and has similarity to rat L34 ribosomal protein Rpl34bp; protein coding                                                                                                   | -2.13 | -1.63 |
| YGL135W | <i>RPL1B</i>  | N-terminally acetylated protein component of the large (60S) ribosomal subunit, nearly identical to Rpl1Ap and has similarity to E. coli L1 and rat L10a ribosomal proteins; rpl1a rpl1b double null mutation is lethal Rpl1bp; protein coding                | -2.65 | -4.96 |
| YGL120C | <i>PRP43</i>  | Prp43p RNA helicase in the DEAH-box family, functions in both RNA polymerase I and polymerase II transcript metabolism, involved in release of the lariat-intron from the spliceosome; protein coding                                                         | -2.33 | 1.47  |
| YNL312W | <i>RFA2</i>   | Rfa2p Subunit of heterotrimeric Replication Protein A (RPA), which is a highly conserved single-stranded DNA binding protein involved in DNA replication, repair, and recombination; protein coding                                                           | -2.00 | -1.52 |
| YGL099W | <i>LSG1</i>   | Lsg1p Putative GTPase involved in 60S ribosomal subunit biogenesis; required for the release of Nmd3p from 60S subunits in the cytoplasm; protein coding                                                                                                      | -1.95 | -1.31 |
| YML034W | <i>SRC1</i>   | Inner nuclear membrane (INM) protein with a putative role in sister chromatid segregation, potentially phosphorylated by Cdc28p; contains                                                                                                                     | 2.17  | 1.25  |

|         |              |                                                                                                                                                                                                                                                                       |       |       |
|---------|--------------|-----------------------------------------------------------------------------------------------------------------------------------------------------------------------------------------------------------------------------------------------------------------------|-------|-------|
|         |              | helix-extension-helix (HEH) motif, nuclear localization signal sequence Src1p; protein coding                                                                                                                                                                         |       |       |
| YDR309C | <i>GIC2</i>  | Gic2p Protein of unknown function involved in initiation of budding and cellular polarization, interacts with Cdc42p via the Cdc42/Rac-interactive binding (CRIB) domain; protein coding                                                                              | -2.40 | 2.17  |
| YDR300C | <i>PRO1</i>  | Gamma-glutamyl kinase, catalyzes the first step in proline biosynthesis Pro1p; protein coding                                                                                                                                                                         | -1.45 | -2.8  |
| YNL283C | <i>WSC2</i>  | Partially redundant sensor-transducer of the stress-activated PKC1-MPK1 signaling pathway involved in maintenance of cell wall integrity and recovery from heat shock; secretory pathway Wsc2p is required for the arrest of secretion response Wsc2p; protein coding | -1.96 | 1.48  |
| YHR203C | <i>RPS4B</i> | Protein component of the small (40S) ribosomal subunit; identical to Rps4Ap and has similarity to rat S4 ribosomal protein Rps4bp; protein coding                                                                                                                     | -2.67 | -2.90 |
| YKL113C | <i>RAD27</i> | 5' to 3' exonuclease, 5' flap endonuclease, required for Okazaki fragment processing and maturation as well as for long-patch base-excision repair; member of the S. pombe RAD2/FEN1 family Rad27p; protein coding                                                    | -1.89 | -1.04 |
| YHR170W | <i>NMD3</i>  | Nmd3p Protein involved in nuclear export of the large ribosomal subunit; acts as a Crm1p-dependent adapter protein for export of nascent ribosomal subunits through the nuclear pore complex; protein coding                                                          | -2.01 | -3.09 |
| YDR225W | <i>HTA1</i>  | Hta1p One of two nearly identical (see also HTA2) histone H2A subtypes; core histone required for chromatin assembly and chromosome function; DNA damage-dependent phosphorylation by Mec1p facilitates DNA repair; acetylated by Nat4p; protein coding               | -5.92 | -1.55 |

|         |               |                                                                                                                                                                                                                                                                     |       |       |
|---------|---------------|---------------------------------------------------------------------------------------------------------------------------------------------------------------------------------------------------------------------------------------------------------------------|-------|-------|
| YDR224C | <i>HTB1</i>   | Htb1p One of two nearly identical (see HTB2) histone H2B subtypes required for chromatin assembly and chromosome function; Rad6p-Bre1p-Lge1p mediated ubiquitination regulates transcriptional activation, meiotic DSB formation and H3 methylation; protein coding | -2.36 | 1.69  |
| YHR139C | <i>SPS100</i> | Protein required for spore wall maturation; expressed during sporulation; may be a component of the spore wall Sps100p; protein coding                                                                                                                              | 6.98  | 2.50  |
| YLR409C | <i>UTP21</i>  | Possible U3 snoRNP protein involved in maturation of pre-18S rRNA, based on computational analysis of large-scale protein-protein interaction data Utp21p; protein coding                                                                                           | -2.04 | -2.24 |
| YOR340C | <i>RPA43</i>  | RNA polymerase I subunit A43 Rpa43p; protein coding                                                                                                                                                                                                                 | -2.06 | -1.26 |
| YKL013C | <i>ARC19</i>  | Arc19p Subunit of the ARP2/3 complex, which is required for the motility and integrity of cortical actin patches; protein coding                                                                                                                                    | -1.53 | -1.20 |
| YKL009W | <i>MRT4</i>   | Mrt4p Protein involved in mRNA turnover and ribosome assembly, localizes to the nucleolus; protein coding                                                                                                                                                           | -3.61 | -3.29 |
| YOR312C | <i>RPL20B</i> | Protein component of the large (60S) ribosomal subunit, nearly identical to Rpl20Ap and has similarity to rat L18a ribosomal protein Rpl20bp; protein coding                                                                                                        | -3.33 | -2.53 |
| YJR145C | <i>RPS4A</i>  | Protein component of the small (40S) ribosomal subunit; mutation affects 20S pre-rRNA processing; identical to Rps4Bp and has similarity to rat S4 ribosomal protein Rps4ap; protein coding                                                                         | -2.79 | -2.70 |
| YDR129C | <i>SAC6</i>   | Fimbrin, actin-bundling protein; cooperates with Scp1p (calponin/transgelin) in the organization and maintenance of the actin cytoskeleton Sac6p; protein coding                                                                                                    | 1.92  | -1.04 |

|         |               |                                                                                                                                                                                                                                                                        |       |       |
|---------|---------------|------------------------------------------------------------------------------------------------------------------------------------------------------------------------------------------------------------------------------------------------------------------------|-------|-------|
| YBR106W | <i>PHO88</i>  | Pho88p Probable membrane protein, involved in phosphate transport; pho88 pho86 double null mutant exhibits enhanced synthesis of repressible acid phosphatase at high inorganic phosphate concentrations; protein coding                                               | -2.76 | -2.30 |
| YHR030C | <i>SLT2</i>   | Serine/threonine MAP kinase involved in regulating the maintenance of cell wall integrity and progression through the cell cycle; regulated by the PKC1-mediated signaling pathway Slr2p; protein coding                                                               | 1.72  | 1.29  |
| YBR084W | <i>MIS1</i>   | Mis1p Mitochondrial C1-tetrahydrofolate synthase, involved in interconversion between different oxidation states of tetrahydrofolate (THF); provides activities of formyl-THF synthetase, methenyl-THF cyclohydrolase, and methylene-THF dehydrogenase; protein coding | -2.04 | -1.91 |
| YOR241W | <i>MET7</i>   | Folylpolyglutamate synthetase, catalyzes extension of the glutamate chains of the folate coenzymes, required for methionine synthesis and for maintenance of mitochondrial DNA Met7p; protein coding                                                                   | -1.98 | -1.82 |
| YNL066W | <i>SUN4</i>   | Cell wall protein related to glucanases, possibly involved in cell wall septation; member of the SUN family Sun4p; protein coding                                                                                                                                      | -6.61 | -1.06 |
| YBR048W | <i>RPS11B</i> | Protein component of the small (40S) ribosomal subunit; identical to Rps11Ap and has similarity to E. coli S17 and rat S11 ribosomal proteins Rps11bp; protein coding                                                                                                  | -4.04 | -3.27 |
| YHL033C | <i>RPL8A</i>  | Ribosomal protein L4 of the large (60S) ribosomal subunit, nearly identical to Rpl8Bp and has similarity to rat L7a ribosomal protein; mutation results in decreased amounts of free 60S subunits Rpl8ap; protein coding                                               | -3.16 | -3.34 |
| YDR060W | <i>MAK21</i>  | Constituent of 66S pre-ribosomal particles, required for large (60S)                                                                                                                                                                                                   | -2.30 | -2.99 |

|         |              |                                                                                                                                                                                                                                              |       |       |
|---------|--------------|----------------------------------------------------------------------------------------------------------------------------------------------------------------------------------------------------------------------------------------------|-------|-------|
|         |              | ribosomal subunit biogenesis; involved in nuclear export of pre-ribosomes; required for maintenance of dsRNA virus; homolog of human CAATT-binding protein Mak21p; protein coding                                                            |       |       |
| YLR249W | <i>YEF3</i>  | Translational elongation factor 3, stimulates the binding of aminoacyl-tRNA (AA-tRNA) to ribosomes by releasing EF-1 alpha from the ribosomal complex; contains two ABC cassettes; binds and hydrolyses ATP Yef3p; protein coding            | -2.16 | -1.84 |
| YOR198C | <i>BFR1</i>  | Bfr1p Component of mRNP complexes associated with polyribosomes; implicated in secretion and nuclear segregation; multicopy suppressor of BFA (Brefeldin A) sensitivity; protein coding                                                      | -2.38 | 1.26  |
| YJR043C | <i>POL32</i> | Pol32p Third subunit of DNA polymerase delta, involved in chromosomal DNA replication; required for error-prone DNA synthesis in the presence of DNA damage and processivity; interacts with Hys2p, PCNA (Pol30p), and Pol1p; protein coding | -1.74 | -1.22 |
| YER116C | <i>SLX8</i>  | Slx8p Subunit of the Slx5-Slx8 substrate-specific ubiquitin ligase complex; stimulated by prior attachment of SUMO to the substrate; protein coding                                                                                          | 1.85  | 2.01  |
| YLR197W | <i>SIK1</i>  | Essential evolutionarily-conserved nucleolar protein component of the box C/D snoRNP complexes that direct 2'-O-methylation of pre-rRNA during its maturation; overexpression causes spindle orientation defects Sik1p; protein coding       | -2.55 | -1.20 |
| YMR307W | <i>GAS1</i>  | Beta-1,3-glucanosyltransferase, required for cell wall assembly; localizes to the cell surface via a glycosylphosphatidylinositol (GPI) anchor Gas1p; protein coding                                                                         | -2.87 | 1.44  |

|         |               |                                                                                                                                                                                                                                                                   |       |       |
|---------|---------------|-------------------------------------------------------------------------------------------------------------------------------------------------------------------------------------------------------------------------------------------------------------------|-------|-------|
| YMR302C | <i>PRP12</i>  | Integral inner mitochondrial membrane protein with a role in maintaining mitochondrial nucleoid structure and number; mutants exhibit an increased rate of mitochondrial DNA escape; shows some sequence similarity to exonucleases Yme2p; protein coding         | 2.13  | 1.23  |
| YLR167W | <i>RPS31</i>  | Fusion protein that is cleaved to yield a ribosomal protein of the small (40S) subunit and ubiquitin; ubiquitin may facilitate assembly of the ribosomal protein into ribosomes; interacts genetically with translation factor eIF2B Rps31p; protein coding       | -2.48 | -5.21 |
| YDL226C | <i>GCSI</i>   | ADP-ribosylation factor GTPase activating protein (ARF GAP), involved in ER-Golgi transport; shares functional similarity with Glo3p Gcs1p; protein coding                                                                                                        | -1.98 | -1.54 |
| YJL190C | <i>RPS22A</i> | Protein component of the small (40S) ribosomal subunit; nearly identical to Rps22Bp and has similarity to E. coli S8 and rat S15a ribosomal proteins Rps22ap; protein coding                                                                                      | -3.24 | -4.07 |
| YER070W | <i>RNR1</i>   | Ribonucleotide-diphosphate reductase (RNR), large subunit; the RNR complex catalyzes the rate-limiting step in dNTP synthesis and is regulated by DNA replication and DNA damage checkpoint pathways via localization of the small subunits Rnr1p; protein coding | -4.62 | -2.13 |
| YDL198C | <i>GGCI</i>   | Ggc1p Mitochondrial GTP/GDP transporter, essential for mitochondrial genome maintenance; has a role in mitochondrial iron transport; member of the mitochondrial carrier family; protein coding                                                                   | 3.35  | 3.93  |
| YDL192W | <i>ARF1</i>   | ADP-ribosylation factor, GTPase of the Ras superfamily involved in regulation of coated vesicle formation in intracellular trafficking within the Golgi; functionally interchangeable with Arf2p Arf1p; protein coding                                            | -2.00 | -1.53 |

|         |              |                                                                                                                                                                                                                                                             |       |       |
|---------|--------------|-------------------------------------------------------------------------------------------------------------------------------------------------------------------------------------------------------------------------------------------------------------|-------|-------|
| YBL035C | <i>POL12</i> | B subunit of DNA polymerase alpha-primase complex, required for initiation of DNA replication during mitotic and premeiotic DNA synthesis; also functions in telomere capping and length regulation Pol12p; protein coding                                  | -2.12 | -1.53 |
| YDL188C | <i>PPH22</i> | Catalytic subunit of protein phosphatase 2A, functionally redundant with Pph21p; methylated at C terminus; forms alternate complexes with several regulatory subunits; involved in signal transduction and regulation of mitosis Pph22p; protein coding     | 1.68  | -1.07 |
| YBL032W | <i>HEK2</i>  | Hek2p RNA binding protein with similarity to hnRNP-K that localizes to the cytoplasm and to subtelomeric DNA; required for the proper localization of ASH1 mRNA; involved in the regulation of telomere position effect and telomere length; protein coding | -1.71 | 1.40  |
| YMR241W | <i>YHM2</i>  | Mitochondrial DNA-binding protein, component of the mitochondrial nucleoid structure, involved in mtDNA replication and segregation of mitochondrial genomes; member of the mitochondrial carrier protein family Yhm2p; protein coding                      | -2.69 | -1.88 |
| YBL003C | <i>HTA2</i>  | Hta2p One of two nearly identical (see also HTA1) histone H2A subtypes; core histone required for chromatin assembly and chromosome function; DNA damage-dependent phosphorylation by Mec1p facilitates DNA repair; acetylated by Nat4p; protein coding     | -6.53 | -1.57 |
| YLR090W | <i>XDJ1</i>  | Putative chaperone, homolog of E. coli DnaJ, closely related to Ydj1p; the authentic, non-tagged protein is detected in highly purified mitochondria in high-throughput studies Xdj1p; protein coding                                                       | 1.59  | 1.04  |
| YER006W | <i>NUG1</i>  | GTPase that associates with nuclear 60S pre-ribosomes, required for                                                                                                                                                                                         | -1.93 | -3.21 |



|         |               |                                                                                                                                                                                                                                                                       |       |       |
|---------|---------------|-----------------------------------------------------------------------------------------------------------------------------------------------------------------------------------------------------------------------------------------------------------------------|-------|-------|
|         |               | export of 60S ribosomal subunits from the nucleus Nug1p; protein coding                                                                                                                                                                                               |       |       |
| YDL143W | <i>CCT4</i>   | Cct4p Subunit of the cytosolic chaperonin Cct ring complex, related to Tcp1p, required for the assembly of actin and tubulins in vivo; protein coding                                                                                                                 | -1.50 | -1.79 |
| YMR202W | <i>ERG2</i>   | C-8 sterol isomerase, catalyzes the isomerization of the delta-8 double bond to the delta-7 position at an intermediate step in ergosterol biosynthesis Erg2p; protein coding                                                                                         | -4.03 | -1.47 |
| YGR123C | <i>PPT1</i>   | Ppt1p Protein serine/threonine phosphatase with similarity to human phosphatase PP5; present in both the nucleus and cytoplasm; expressed during logarithmic growth; computational analyses suggest roles in phosphate metabolism and rRNA processing; protein coding | -1.91 | -3.29 |
| YJL074C | <i>SMC3</i>   | Smc3p Subunit of the multiprotein cohesin complex required for sister chromatid cohesion in mitotic cells; also required, with Rec8p, for cohesion and recombination during meiosis; phylogenetically conserved SMC chromosomal ATPase family member; protein coding  | -2.02 | -1.78 |
| YDL083C | <i>RPS16B</i> | Protein component of the small (40S) ribosomal subunit; identical to Rps16Ap and has similarity to E. coli S9 and rat S16 ribosomal proteins Rps16bp; protein coding                                                                                                  | -3.23 | -3.08 |
| YMR142C | <i>RPL13B</i> | Protein component of the large (60S) ribosomal subunit, nearly identical to Rpl13Ap; not essential for viability; has similarity to rat L13 ribosomal protein Rpl13bp; protein coding                                                                                 | -2.16 | -2.19 |
| YAL025C | <i>MAK16</i>  | Essential nuclear protein, constituent of 66S pre-ribosomal particles; required for maturation of 25S and 5.8S rRNAs; required for maintenance of M1 satellite double-stranded RNA of the L-A virus Mak16p; protein coding                                            | -3.03 | -1.97 |

|                             |               |                                                                                                                                                                                                                                                        |                                    |                                    |
|-----------------------------|---------------|--------------------------------------------------------------------------------------------------------------------------------------------------------------------------------------------------------------------------------------------------------|------------------------------------|------------------------------------|
| YJL042W                     | <i>MHP1</i>   | Mhp1p Microtubule-associated protein involved in assembly and stabilization of microtubules; overproduction results in cell cycle arrest at G2 phase; similar to Drosophila protein MAP and to mammalian MAP4 proteins; protein coding                 | 2.29                               | 1.29                               |
| YGR070W                     | <i>ROM1</i>   | GDP/GTP exchange protein (GEP) for Rho1p; mutations are synthetically lethal with mutations in rom2, which also encodes a GEP Rom1p; protein coding                                                                                                    | 2.81                               | 1.34                               |
| YOL121C                     | <i>RPS19A</i> | Protein component of the small (40S) ribosomal subunit, required for assembly and maturation of pre-40 S particles; mutations in human RPS19 are associated with Diamond Blackfan anemia; nearly identical to Rps19Bp Rps19ap; protein coding          | -2.12                              | -2.18                              |
| YMR116C                     | <i>ASC1</i>   | Asc1p G-protein beta subunit and guanine nucleotide dissociation inhibitor for Gpa2p; ortholog of RACK1 that inhibits translation; core component of the small (40S) ribosomal subunit; represses Gcn4p in the absence of amino acid starvation; ncRNA | -3.77                              | -3.05                              |
| YLL045C                     | <i>RPL8B</i>  | Ribosomal protein L4 of the large (60S) ribosomal subunit, nearly identical to Rpl8Ap and has similarity to rat L7a ribosomal protein; mutation results in decreased amounts of free 60S subunits Rpl8bp; protein coding                               | -2.55                              | -4.72                              |
| <b>YORF</b>                 | <b>Gene</b>   | <b>Description</b>                                                                                                                                                                                                                                     | <b>Fold change</b><br><i>myo1Δ</i> | <b>Fold change</b><br><i>chs2Δ</i> |
| <b>Protein biosynthesis</b> |               |                                                                                                                                                                                                                                                        |                                    |                                    |
| YGR034W                     | <i>RPL26B</i> | Protein component of the large (60S) ribosomal subunit, nearly identical to Rpl26Ap and has similarity to E. coli L24 and rat L26 ribosomal proteins;                                                                                                  | -2.60                              | -1.99                              |

|           |               |                                                                                                                                                                                                                                                                    |       |       |
|-----------|---------------|--------------------------------------------------------------------------------------------------------------------------------------------------------------------------------------------------------------------------------------------------------------------|-------|-------|
|           |               | binds to 5.8S rRNA Rpl26bp; protein coding                                                                                                                                                                                                                         |       |       |
| YPL249C-A | <i>RPL36B</i> | Protein component of the large (60S) ribosomal subunit, nearly identical to Rpl36Ap and has similarity to rat L36 ribosomal protein; binds to 5.8 S rRNA Rpl36bp; protein coding                                                                                   | -2.29 | -1.89 |
| YDR471W   | <i>RPL27B</i> | Protein component of the large (60S) ribosomal subunit, nearly identical to Rpl27Ap and has similarity to rat L27 ribosomal protein Rpl27bp; protein coding                                                                                                        | -2.55 | -1.80 |
| YPL220W   | <i>RPL1A</i>  | N-terminally acetylated protein component of the large (60S) ribosomal subunit, nearly identical to Rpl1Bp and has similarity to E. coli L1 and rat L10a ribosomal proteins; rpl1a rpl1b double null mutation is lethal Rpl1ap; protein coding                     | -2.48 | -4.36 |
| YCR046C   | <i>IMG1</i>   | Img1p Mitochondrial ribosomal protein of the large subunit, required for respiration and for maintenance of the mitochondrial genome; protein coding                                                                                                               | -1.58 | -1.25 |
| YIL133C   | <i>RPL16A</i> | N-terminally acetylated protein component of the large (60S) ribosomal subunit, binds to 5.8 S rRNA; has similarity to Rpl16Bp, E. coli L13 and rat L13a ribosomal proteins; transcriptionally regulated by Rap1p Rpl16ap; protein coding                          | -2.71 | -2.46 |
| YGL189C   | <i>RPS26A</i> | Protein component of the small (40S) ribosomal subunit; nearly identical to Rps26Bp and has similarity to rat S26 ribosomal protein Rps26ap; protein coding                                                                                                        | -2.12 | -2.62 |
| YPL143W   | <i>RPL33A</i> | N-terminally acetylated ribosomal protein L37 of the large (60S) ribosomal subunit, nearly identical to Rpl33Bp and has similarity to rat L35a; rpl33a null mutant exhibits slow growth while rpl33a rpl33b double null mutant is inviable Rpl33ap; protein coding | -1.86 | -1.54 |
| YPL131W   | <i>RPL5</i>   | Protein component of the large (60S) ribosomal subunit with similarity to                                                                                                                                                                                          | -2.40 | -3.71 |

|         |               |                                                                                                                                                                                                                                   |       |       |
|---------|---------------|-----------------------------------------------------------------------------------------------------------------------------------------------------------------------------------------------------------------------------------|-------|-------|
|         |               | E. coli L18 and rat L5 ribosomal proteins; binds 5S rRNA and is required for 60S subunit assembly Rpl5p; protein coding                                                                                                           |       |       |
| YGL147C | <i>RPL9A</i>  | Protein component of the large (60S) ribosomal subunit, nearly identical to Rpl9Bp and has similarity to E. coli L6 and rat L9 ribosomal proteins Rpl9ap; protein coding                                                          | -2.39 | -4.36 |
| YML073C | <i>RPL6A</i>  | N-terminally acetylated protein component of the large (60S) ribosomal subunit, has similarity to Rpl6Bp and to rat L6 ribosomal protein; binds to 5.8S rRNA Rpl6ap; protein coding                                               | -2.51 | -2.32 |
| YML063W | <i>RPS1B</i>  | Ribosomal protein 10 (rp10) of the small (40S) subunit; nearly identical to Rps1Ap and has similarity to rat S3a ribosomal protein Rps1bp; protein coding                                                                         | -3.28 | -2.41 |
| YKL180W | <i>RPL17A</i> | Protein component of the large (60S) ribosomal subunit, nearly identical to Rpl17Bp and has similarity to E. coli L22 and rat L17 ribosomal proteins; copurifies with the Dam1 complex (aka DASH complex) Rpl17ap; protein coding | -3.49 | -2.46 |
| YGL123W | <i>RPS2</i>   | Protein component of the small (40S) subunit, essential for control of translational accuracy; has similarity to E. coli S5 and rat S2 ribosomal proteins Rps2p; protein coding                                                   | -2.40 | -4.09 |
| YIL018W | <i>RPL2B</i>  | Protein component of the large (60S) ribosomal subunit, identical to Rpl2Ap and has similarity to E. coli L2 and rat L8 ribosomal proteins; expression is upregulated at low temperatures Rpl2bp; protein coding                  | -3.24 | -1.89 |
| YPL090C | <i>RPS6A</i>  | Protein component of the small (40S) ribosomal subunit; identical to Rps6Bp and has similarity to rat S6 ribosomal protein Rps6ap; protein coding                                                                                 | -2.52 | -2.10 |
| YPL079W | <i>RPL21B</i> | Protein component of the large (60S) ribosomal subunit, nearly identical to Rpl21Ap and has similarity to rat L21                                                                                                                 | -3.22 | -3.09 |

|         |               |                                                                                                                                                                                                                                                |       |       |
|---------|---------------|------------------------------------------------------------------------------------------------------------------------------------------------------------------------------------------------------------------------------------------------|-------|-------|
|         |               | ribosomal protein Rpl21bp; protein coding                                                                                                                                                                                                      |       |       |
| YGL076C | <i>RPL7A</i>  | Protein component of the large (60S) ribosomal subunit, nearly identical to Rpl7Bp and has similarity to E. coli L30 and rat L7 ribosomal proteins; contains a conserved C-terminal Nucleic acid Binding Domain (NDB2) Rpl7ap; ncRNA           | -1.82 | -1.51 |
| YGL031C | <i>RPL24A</i> | Ribosomal protein L30 of the large (60S) ribosomal subunit, nearly identical to Rpl24Bp and has similarity to rat L24 ribosomal protein; not essential for translation but may be required for normal translation rate Rpl24ap; protein coding | -2.67 | -1.51 |
| YGL030W | <i>RPL30</i>  | Protein component of the large (60S) ribosomal subunit, has similarity to rat L30 ribosomal protein; involved in pre-rRNA processing in the nucleolus; autoregulates splicing of its transcript Rpl30p; protein coding                         | -3.01 | -1.77 |
| YKL081W | <i>TEF4</i>   | Tef4p Translation elongation factor EF-1 gamma; ncRNA                                                                                                                                                                                          | -2.90 | -1.15 |
| YBR191W | <i>RPL21A</i> | Protein component of the large (60S) ribosomal subunit, nearly identical to Rpl21Bp and has similarity to rat L21 ribosomal protein Rpl21ap; protein coding                                                                                    | -3.75 | -2.78 |
| YBR189W | <i>RPS9B</i>  | Protein component of the small (40S) ribosomal subunit; nearly identical to Rps9Ap and has similarity to E. coli S4 and rat S9 ribosomal proteins Rps9bp; protein coding                                                                       | -2.28 | -3.97 |
| YBR181C | <i>RPS6B</i>  | Protein component of the small (40S) ribosomal subunit; identical to Rps6Ap and has similarity to rat S6 ribosomal protein Rps6bp; protein coding                                                                                              | -2.51 | -2.34 |
| YLR388W | <i>RPS29A</i> | Protein component of the small (40S) ribosomal subunit; nearly identical to Rps29Bp and has similarity to rat S29 and E. coli S14 ribosomal proteins Rps29ap; protein coding                                                                   | -2.01 | -1.82 |

|           |               |                                                                                                                                                                                                                                                                        |       |       |
|-----------|---------------|------------------------------------------------------------------------------------------------------------------------------------------------------------------------------------------------------------------------------------------------------------------------|-------|-------|
| YFR032C-A | <i>RPL29</i>  | Protein component of the large (60S) ribosomal subunit, has similarity to rat L29 ribosomal protein; not essential for translation, but required for proper joining of the large and small ribosomal subunits and for normal translation rate Rpl29p; protein coding   | -1.88 | -2.14 |
| YFR031C-A | <i>RPL2A</i>  | Protein component of the large (60S) ribosomal subunit, identical to Rpl2Bp and has similarity to E. coli L2 and rat L8 ribosomal proteins Rpl2ap; protein coding                                                                                                      | -3.62 | -1.52 |
| YNL162W   | <i>RPL42A</i> | Protein component of the large (60S) ribosomal subunit, identical to Rpl42Bp and has similarity to rat L44 ribosomal protein Rpl42ap; protein coding                                                                                                                   | -2.43 | -3.06 |
| YLR344W   | <i>RPL26A</i> | Protein component of the large (60S) ribosomal subunit, nearly identical to Rpl26Bp and has similarity to E. coli L24 and rat L26 ribosomal proteins; binds to 5.8S rRNA Rpl26ap; protein coding                                                                       | -2.56 | -1.83 |
| YBR121C   | <i>GRS1</i>   | Cytoplasmic and mitochondrial glycyl-tRNA synthase that ligates glycine to the cognate anticodon bearing tRNA; transcription termination factor that may interact with the 3'-end of pre-mRNA to promote 3'-end formation Grs1p; protein coding                        | -2.08 | -2.43 |
| YFL022C   | <i>FRS2</i>   | Alpha subunit of cytoplasmic phenylalanyl-tRNA synthetase, forms a tetramer with Frs1p to form active enzyme; evolutionarily distant from mitochondrial phenylalanyl-tRNA synthetase based on protein sequence, but substrate binding is similar Frs2p; protein coding | -1.81 | -1.75 |
| YNL096C   | <i>RPS7B</i>  | Protein component of the small (40S) ribosomal subunit, nearly identical to Rps7Ap; interacts with Kti11p; deletion causes hypersensitivity to zymocin; has similarity to rat S7 and Xenopus S8 ribosomal                                                              | -2.13 | -1.16 |

|         |               |                                                                                                                                                                                                                                           |       |       |
|---------|---------------|-------------------------------------------------------------------------------------------------------------------------------------------------------------------------------------------------------------------------------------------|-------|-------|
|         |               | proteins Rps7bp; protein coding                                                                                                                                                                                                           |       |       |
| YNL069C | <i>RPL16B</i> | N-terminally acetylated protein component of the large (60S) ribosomal subunit, binds to 5.8 S rRNA; has similarity to Rpl16Ap, E. coli L13 and rat L13a ribosomal proteins; transcriptionally regulated by Rap1p Rpl16bp; protein coding | -1.84 | -2.64 |
| YNL067W | <i>RPL9B</i>  | Protein component of the large (60S) ribosomal subunit, nearly identical to Rpl9Ap and has similarity to E. coli L6 and rat L9 ribosomal proteins Rpl9bp; protein coding                                                                  | -2.38 | -3.19 |
| YER131W | <i>RPS26B</i> | Protein component of the small (40S) ribosomal subunit; nearly identical to Rps26Ap and has similarity to rat S26 ribosomal protein Rps26bp; protein coding                                                                               | -2.76 | -3.55 |
| YDR025W | <i>RPS11A</i> | Protein component of the small (40S) ribosomal subunit; identical to Rps11Bp and has similarity to E. coli S17 and rat S11 ribosomal proteins Rps11ap; protein coding                                                                     | -3.19 | -2.92 |
| YER102W | <i>RPS8B</i>  | Protein component of the small (40S) ribosomal subunit; identical to Rps8Ap and has similarity to rat S8 ribosomal protein Rps8bp; protein coding                                                                                         | -2.53 | -2.97 |
| YGR264C | <i>MES1</i>   | Mes1p Methionyl-tRNA synthetase, forms a complex with glutamyl-tRNA synthetase (Gus1p) and Arc1p, which increases the catalytic efficiency of both tRNA synthetases; also has a role in nuclear export of tRNAs; protein coding           | -2.04 | -2.97 |
| YER074W | <i>RPS24A</i> | Protein component of the small (40S) ribosomal subunit; identical to Rps24Bp and has similarity to rat S24 ribosomal protein Rps24ap; protein coding                                                                                      | -2.06 | -2.29 |
| YJL177W | <i>RPL17B</i> | Protein component of the large (60S) ribosomal subunit, nearly identical to Rpl17Ap and has similarity to E. coli L22 and rat L17 ribosomal proteins Rpl17bp; protein coding                                                              | -4.81 | -2.01 |

|           |               |                                                                                                                                                                                                                                                      |       |       |
|-----------|---------------|------------------------------------------------------------------------------------------------------------------------------------------------------------------------------------------------------------------------------------------------------|-------|-------|
| YGR214W   | <i>RPS0A</i>  | Protein component of the small (40S) ribosomal subunit, nearly identical to Rps0Bp; required for maturation of 18S rRNA along with Rps0Bp; deletion of either RPS0 gene reduces growth rate, deletion of both genes is lethal Rps0ap; protein coding | -2.67 | -1.94 |
| YER056C-A | <i>RPL34A</i> | Protein component of the large (60S) ribosomal subunit, nearly identical to Rpl34Bp and has similarity to rat L34 ribosomal protein Rpl34ap; protein coding                                                                                          | -2.96 | -2.43 |
| YOR096W   | <i>RPS7A</i>  | Protein component of the small (40S) ribosomal subunit, nearly identical to Rps7Bp; interacts with Kti11p; deletion causes hypersensitivity to zymocin; has similarity to rat S7 and Xenopus S8 ribosomal proteins Rps7ap; protein coding            | -2.62 | -2.49 |
| YDL184C   | <i>RPL41A</i> | Ribosomal protein L47 of the large (60S) ribosomal subunit, identical to Rpl41Bp and has similarity to rat L41 ribosomal protein; comprised of only 25 amino acids; rpl41a rpl41b double null mutant is viable Rpl41ap; protein coding               | -1.99 | -3.33 |
| YGR185C   | <i>TYS1</i>   | Cytoplasmic tyrosyl-tRNA synthetase, class I aminoacyl-tRNA synthetase that aminoacylates tRNA(Tyr), required for cytoplasmic protein synthesis, interacts with positions 34 and 35 of the anticodon of tRNA <sup>Tyr</sup>  Tys1p; protein coding   | -1.64 | -1.68 |
| YDL136W   | <i>RPL35B</i> | Protein component of the large (60S) ribosomal subunit, identical to Rpl35Ap and has similarity to rat L35 ribosomal protein Rpl35bp; protein coding                                                                                                 | -2.21 | -1.89 |
| YDL133C-A | <i>RPL41B</i> | Ribosomal protein L47 of the large (60S) ribosomal subunit, identical to Rpl41Ap and has similarity to rat L41 ribosomal protein; comprised of only 25 amino acids; rpl41a rpl41b double null mutant is viable Rpl41bp; protein coding               | -2.13 | -3.45 |



|         |               |                                                                                                                                                                                                                                                                     |       |       |
|---------|---------------|---------------------------------------------------------------------------------------------------------------------------------------------------------------------------------------------------------------------------------------------------------------------|-------|-------|
| YPR102C | <i>RPL11A</i> | Protein component of the large (60S) ribosomal subunit, nearly identical to Rpl11Bp; involved in ribosomal assembly; depletion causes degradation of proteins and RNA of the 60S subunit; has similarity to E. coli L5 and rat L11 Rpl11ap; protein coding          | -2.77 | -2.80 |
| YLR061W | <i>RPL22A</i> | Protein component of the large (60S) ribosomal subunit, has similarity to Rpl22Bp and to rat L22 ribosomal protein Rpl22ap; protein coding                                                                                                                          | -3.89 | -2.86 |
| YLR060W | <i>FRS1</i>   | Beta subunit of cytoplasmic phenylalanyl-tRNA synthetase, forms a tetramer with Frs2p to generate active enzyme; sequence is evolutionarily distant from mitochondrial phenylalanyl-tRNA synthetase (Msf1p), but substrate binding is similar Frs1p; protein coding | -2.54 | -2.39 |
| YEL054C | <i>RPL12A</i> | Protein component of the large (60S) ribosomal subunit, nearly identical to Rpl12Bp; rpl12a rpl12b double mutant exhibits slow growth and slow translation; has similarity to E. coli L11 and rat L12 ribosomal proteins Rpl12ap; protein coding                    | -2.45 | -3.09 |
| YDL082W | <i>RPL13A</i> | Protein component of the large (60S) ribosomal subunit, nearly identical to Rpl13Bp; not essential for viability; has similarity to rat L13 ribosomal protein Rpl13ap; protein coding                                                                               | -3.24 | -2.58 |
| YPR043W | <i>RPL43A</i> | Protein component of the large (60S) ribosomal subunit, identical to Rpl43Bp and has similarity to rat L37a ribosomal protein; null mutation confers a dominant lethal phenotype Rpl43ap; protein coding                                                            | -2.79 | -2.69 |
| YOL139C | <i>CDC33</i>  | Cdc33p Cytoplasmic mRNA cap binding protein; the eIF4E-cap complex is responsible for mediating cap-dependent mRNA translation via interactions with the translation initiation factor eIF4G (Tif4631p or Tif4632p); protein coding                                 | -2.11 | -1.68 |

|                   |               |                                                                                                                                                                                                                                                                        |                                 |                                 |
|-------------------|---------------|------------------------------------------------------------------------------------------------------------------------------------------------------------------------------------------------------------------------------------------------------------------------|---------------------------------|---------------------------------|
| YDL061C           | <i>RPS29B</i> | Protein component of the small (40S) ribosomal subunit; nearly identical to Rps29Ap and has similarity to rat S29 and E. coli S14 ribosomal proteins Rps29bp; protein coding                                                                                           | -2.48                           | -2.13                           |
| YOL127W           | <i>RPL25</i>  | Primary rRNA-binding ribosomal protein component of the large (60S) ribosomal subunit, has similarity to E. coli L23 and rat L23a ribosomal proteins; binds to 26S rRNA via a conserved C-terminal motif Rpl25p; protein coding                                        | -2.96                           | -2.38                           |
| YOL120C           | <i>RPL18A</i> | Protein component of the large (60S) ribosomal subunit, identical to Rpl18Bp and has similarity to rat L18 ribosomal protein; intron of RPL18A pre-mRNA forms stem-loop structures that are a target for Rnt1p cleavage leading to degradation Rpl18ap; protein coding | -3.67                           | -2.11                           |
| YOL097C           | <i>WRS1</i>   | Cytoplasmic tryptophanyl-tRNA synthetase, aminoacylates tryptophanyl-tRNA Wrs1p; protein coding                                                                                                                                                                        | -2.56                           | -2.19                           |
| <b>YORF</b>       | <b>Gene</b>   | <b>Description</b>                                                                                                                                                                                                                                                     | <b>Fold change <i>myo1</i>Δ</b> | <b>Fold change <i>chs2</i>Δ</b> |
| <b>Metabolism</b> |               |                                                                                                                                                                                                                                                                        |                                 |                                 |
| YOL056W           | <i>GPM3</i>   | Gpm3p Homolog of Gpm1p phosphoglycerate mutase, which converts 3-phosphoglycerate to 2-phosphoglycerate in glycolysis; may be non-functional derivative of a gene duplication event; protein coding                                                                    | -1.48                           | -1.41                           |
| YGL257C           | <i>MNT2</i>   | Mannosyltransferase involved in adding the 4th and 5th mannose residues of O-linked glycans Mnt2p; protein coding                                                                                                                                                      | -2.35                           | -1.80                           |
| YKR066C           | <i>CCP1</i>   | Ccp1p Mitochondrial cytochrome-c peroxidase; degrades reactive oxygen species in mitochondria, involved in the response to oxidative stress; protein coding                                                                                                            | 6.02                            | -1.67                           |
| YML126C           | <i>ERG13</i>  | 3-hydroxy-3-methylglutaryl-CoA (HMG-CoA) synthase, catalyzes the                                                                                                                                                                                                       | -2.15                           | -1.41                           |

|         |              |                                                                                                                                                                                                                                                                      |       |       |
|---------|--------------|----------------------------------------------------------------------------------------------------------------------------------------------------------------------------------------------------------------------------------------------------------------------|-------|-------|
|         |              | formation of HMG-CoA from acetyl-CoA and acetoacetyl-CoA; involved in the second step in mevalonate biosynthesis Erg13p; protein coding                                                                                                                              |       |       |
| YML120C | <i>NDI1</i>  | NADH:ubiquinone oxidoreductase, transfers electrons from NADH to ubiquinone in the respiratory chain but does not pump protons, in contrast to the higher eukaryotic multisubunit respiratory complex I; phosphorylated; homolog of human AMID Ndi1p; protein coding | 2.15  | 2.45  |
| YML106W | <i>URA5</i>  | One of two orotate phosphoribosyltransferase isozymes (see also URA10) that catalyze the fifth enzymatic step in de novo biosynthesis of pyrimidines, converting orotate into orotidine-5'-phosphate Ura5p; protein coding                                           | -3.45 | -2.48 |
| YDR380W | <i>ARO10</i> | Aro10p Phenylpyruvate decarboxylase, catalyzes decarboxylation of phenylpyruvate to phenylacetaldehyde, which is the first specific step in the Ehrlich pathway; protein coding                                                                                      | -3.58 | 3.54  |
| YKL211C | <i>TRP3</i>  | Bifunctional enzyme exhibiting both indole-3-glycerol-phosphate synthase and anthranilate synthase activities, forms multifunctional hetero-oligomeric anthranilate synthase:indole-3-glycerol phosphate synthase enzyme complex with Trp2p Trp3p; protein coding    | -1.70 | 2.12  |
| YNR019W | <i>ARE2</i>  | Acyl-CoA:sterol acyltransferase, isozyme of Are1p; endoplasmic reticulum enzyme that contributes the major sterol esterification activity in the presence of oxygen Are2p; protein coding                                                                            | 1.41  | 2.23  |
| YGL148W | <i>ARO2</i>  | Aro2p Bifunctional chorismate synthase and flavin reductase, catalyzes the conversion of 5-enolpyruvylshikimate 3-phosphate (EPSP) to form chorismate, which is a precursor to aromatic amino acids; protein coding                                                  | -2.57 | -2.09 |

|         |             |                                                                                                                                                                                                                                                       |       |       |
|---------|-------------|-------------------------------------------------------------------------------------------------------------------------------------------------------------------------------------------------------------------------------------------------------|-------|-------|
| YIL045W | <i>PIG2</i> | Pig2p Putative type-1 protein phosphatase targeting subunit that tethers Glc7p type-1 protein phosphatase to Gsy2p glycogen synthase; protein coding                                                                                                  | 6.76  | 9.00  |
| YDR321W | <i>ASP1</i> | Asp1p Cytosolic L-asparaginase, involved in asparagine catabolism; protein coding                                                                                                                                                                     | -2.06 | -2.95 |
| YKL150W | <i>MCR1</i> | Mcr1p Mitochondrial NADH-cytochrome b5 reductase, involved in ergosterol biosynthesis; protein coding                                                                                                                                                 | 6.11  | 2.29  |
| YML008C | <i>ERG6</i> | Delta(24)-sterol C-methyltransferase, converts zymosterol to fecosterol in the ergosterol biosynthetic pathway by methylating position C-24; localized to both lipid particles and mitochondrial outer membrane Erg6p; protein coding                 | -2.20 | -1.29 |
| YHR193C | <i>EGD2</i> | Alpha subunit of the heteromeric nascent polypeptide-associated complex (NAC) involved in protein sorting and translocation, associated with cytoplasmic ribosomes Egd2p; protein coding                                                              | -1.87 | -1.80 |
| YBR252W | <i>DUT1</i> | Dut1p dUTPase, catalyzes hydrolysis of dUTP to dUMP and PPi, thereby preventing incorporation of uracil into DNA during replication; critical for the maintenance of genetic stability; protein coding                                                | -2.39 | -1.78 |
| YBR249C | <i>ARO4</i> | 3-deoxy-D-arabino-heptulosonate-7-phosphate (DAHP) synthase, catalyzes the first step in aromatic amino acid biosynthesis and is feedback-inhibited by tyrosine or high concentrations of phenylalanine or tryptophan Aro4p; protein coding           | -2.67 | -3.59 |
| YBR248C | <i>HIS7</i> | His7p Imidazole glycerol phosphate synthase (glutamine amidotransferase:cyclase), catalyzes the fifth and sixth steps of histidine biosynthesis and also produces 5-aminoimidazole-4-carboxamide ribotide (AICAR), a purine precursor; protein coding | -2.02 | -1.45 |

|         |              |                                                                                                                                                                                                                                                      |       |       |
|---------|--------------|------------------------------------------------------------------------------------------------------------------------------------------------------------------------------------------------------------------------------------------------------|-------|-------|
| YGL022W | <i>STT3</i>  | Stt3p Subunit of the oligosaccharyltransferase complex of the ER lumen, which catalyzes asparagine-linked glycosylation of newly synthesized proteins; forms a subcomplex with Ost3p and Ost4p and is directly involved in catalysis; protein coding | -1.75 | -1.24 |
| YDR231C | <i>COX20</i> | Cox20p Mitochondrial inner membrane protein, required for proteolytic processing of Cox2p and its assembly into cytochrome c oxidase; protein coding                                                                                                 | 2.15  | 2.18  |
| YGL012W | <i>ERG4</i>  | C-24(28) sterol reductase, catalyzes the final step in ergosterol biosynthesis; mutants are viable, but lack ergosterol Erg4p; protein coding                                                                                                        | -2.54 | -2.16 |
| YOR377W | <i>ATF1</i>  | Alcohol acetyltransferase with potential roles in lipid and sterol metabolism; responsible for the major part of volatile acetate ester production during fermentation Atf1p; protein coding                                                         | 2.20  | 2.32  |
| YHR128W | <i>FUR1</i>  | Fur1p Uracil phosphoribosyltransferase, synthesizes UMP from uracil; involved in the pyrimidine salvage pathway; protein coding                                                                                                                      | -2.72 | -2.75 |
| YHR123W | <i>EPT1</i>  | Ept1p sn-1,2-diacylglycerol ethanolamine- and cholinephosphotranferase; not essential for viability; protein coding                                                                                                                                  | -1.90 | -1.25 |
| YBR183W | <i>YPC1</i>  | Alkaline ceramidase that also has reverse (CoA-independent) ceramide synthase activity, catalyzes both breakdown and synthesis of phytoceramide; overexpression confers fumonisin B1 resistance Ypc1p; protein coding                                | 2.89  | 1.48  |
| YNL153C | <i>GIM3</i>  | Gim3p Subunit of the heterohexameric cochaperone prefoldin complex which binds specifically to cytosolic chaperonin and transfers target proteins to it; protein coding                                                                              | -2.06 | -1.30 |

|         |             |                                                                                                                                                                                                                                                                       |       |       |
|---------|-------------|-----------------------------------------------------------------------------------------------------------------------------------------------------------------------------------------------------------------------------------------------------------------------|-------|-------|
| YBR117C | <i>TKL2</i> | Tkl2p Transketolase, similar to Tkl1p; catalyzes conversion of xylulose-5-phosphate and ribose-5-phosphate to sedoheptulose-7-phosphate and glyceraldehyde-3-phosphate in the pentose phosphate pathway; needed for synthesis of aromatic amino acids; protein coding | 14.35 | 1.27  |
| YJR143C | <i>PMT4</i> | Pmt4p Protein O-mannosyltransferase, transfers mannose residues from dolichyl phosphate-D-mannose to protein serine/threonine residues; appears to form homodimers in vivo and does not complex with other Pmt proteins; target for new antifungals; protein coding   | -2.83 | -2.43 |
| YJR121W | <i>ATP2</i> | Atp2p Beta subunit of the F1 sector of mitochondrial F1F0 ATP synthase, which is a large, evolutionarily conserved enzyme complex required for ATP synthesis; phosphorylated; protein coding                                                                          | 2.76  | 2.88  |
| YOR236W | <i>DFR1</i> | Dfr1p Dihydrofolate reductase, part of the dTTP biosynthetic pathway, involved in folate metabolism, possibly required for mitochondrial function; protein coding                                                                                                     | -2.77 | -1.47 |
| YLR251W | <i>SYM1</i> | Protein required for ethanol metabolism; induced by heat shock and localized to the inner mitochondrial membrane; homologous to mammalian peroxisomal membrane protein Mpv17 Sym1p; protein coding                                                                    | 3.30  | 1.91  |
| YLR221C | <i>RSA3</i> | Protein with a likely role in ribosomal maturation, required for accumulation of wild-type levels of large (60S) ribosomal subunits; binds to the helicase Dbp6p in pre-60S ribosomal particles in the nucleolus Rsa3p; protein coding                                | -1.90 | -1.17 |
| YGR285C | <i>ZUO1</i> | Cytosolic ribosome-associated chaperone that acts, together with Ssz1p and the Ssb proteins, as a chaperone for nascent polypeptide                                                                                                                                   | -1.79 | 1.69  |

|         |             |                                                                                                                                                                                                                                                                     |       |       |
|---------|-------------|---------------------------------------------------------------------------------------------------------------------------------------------------------------------------------------------------------------------------------------------------------------------|-------|-------|
|         |             | chains; contains a DnaJ domain and functions as a J-protein partner for Ssb1p and Ssb2p Zuo1p; protein coding                                                                                                                                                       |       |       |
| YGR256W | <i>GND2</i> | 6-phosphogluconate dehydrogenase (decarboxylating), catalyzes an NADPH regenerating reaction in the pentose phosphate pathway; required for growth on D-glucono-delta-lactone Gnd2p; protein coding                                                                 | 9.92  | 3.06  |
| YGR248W | <i>SOLA</i> | 6-phosphogluconolactonase with similarity to Sol3p Sol4p; protein coding                                                                                                                                                                                            | 15.32 | 2.97  |
| YMR300C | <i>ADE4</i> | Ade4p Phosphoribosylpyrophosphate amidotransferase (PRPPAT; amidophosphoribosyltransferase), catalyzes first step of the 'de novo' purine nucleotide biosynthetic pathway; protein coding                                                                           | -1.78 | 2.17  |
| YMR274C | <i>RCE1</i> | Rce1p Type II CAAX prenyl protease involved in the proteolysis and maturation of Ras and the a-factor mating pheromone; protein coding                                                                                                                              | -1.81 | -1.26 |
| YDL205C | <i>HEM3</i> | Hem3p Phorphobilinogen deaminase, catalyzes the conversion of 4-porphobilinogen to hydroxymethylbilane, the third step in the heme biosynthetic pathway; localizes to both the cytoplasm and nucleus; expression is regulated by Hap2p-Hap3p; protein coding        | 1.96  | 3.15  |
| YER055C | <i>HIS1</i> | ATP phosphoribosyltransferase, a hexameric enzyme, catalyzes the first step in histidine biosynthesis; mutations cause histidine auxotrophy and sensitivity to Cu, Co, and Ni salts; transcription is regulated by general amino acid control His1p; protein coding | -2.32 | -2.05 |
| YER043C | <i>SAH1</i> | S-adenosyl-L-homocysteine hydrolase, catabolizes S-adenosyl-L-homocysteine which is formed after donation of the activated methyl group of S-adenosyl-L-methionine (AdoMet) to an acceptor Sah1p; protein coding                                                    | -2.78 | -1.26 |

|         |              |                                                                                                                                                                                                                                                                   |       |       |
|---------|--------------|-------------------------------------------------------------------------------------------------------------------------------------------------------------------------------------------------------------------------------------------------------------------|-------|-------|
| YJL155C | <i>FBP26</i> | Fbp26p Fructose-2,6-bisphosphatase, required for glucose metabolism; protein coding                                                                                                                                                                               | 2.09  | 1.93  |
| YMR250W | <i>GADI</i>  | Gad1p Glutamate decarboxylase, converts glutamate into gamma-aminobutyric acid (GABA) during glutamate catabolism; involved in response to oxidative stress; protein coding                                                                                       | 7.09  | 10.78 |
| YPR145W | <i>ASN1</i>  | Asn1p Asparagine synthetase, isozyme of Asn2p; catalyzes the synthesis of L-asparagine from L-aspartate in the asparagine biosynthetic pathway; protein coding                                                                                                    | -4.10 | -1.73 |
| YBL015W | <i>ACH1</i>  | Acetyl-coA hydrolase, primarily localized to mitochondria; phosphorylated; required for acetate utilization and for diploid pseudohyphal growth Ach1p; protein coding                                                                                             | 1.93  | 6.16  |
| YER023W | <i>PRO3</i>  | Delta 1-pyrroline-5-carboxylate reductase, catalyzes the last step in proline biosynthesis Pro3p; protein coding                                                                                                                                                  | -2.07 | 1.36  |
| YLR100W | <i>ERG27</i> | 3-keto sterol reductase, catalyzes the last of three steps required to remove two C-4 methyl groups from an intermediate in ergosterol biosynthesis; mutants are sterol auxotrophs Erg27p; protein coding                                                         | -2.59 | -1.34 |
| YDL141W | <i>BPL1</i>  | Biotin:apoprotein ligase, covalently modifies proteins with the addition of biotin, required for acetyl-CoA carboxylase (Acc1p) holoenzyme formation Bpl1p; protein coding                                                                                        | -2.08 | -1.32 |
| YAL060W | <i>BDH1</i>  | Bdh1p NAD-dependent (2R,3R)-2,3-butanediol dehydrogenase, a zinc-containing medium-chain alcohol dehydrogenase, produces 2,3-butanediol from acetoin during fermentation and allows using 2,3-butanediol as a carbon source during aerobic growth; protein coding | 5.86  | 2.67  |
| YDL103C | <i>QR11</i>  | Qri1p UDP-N-acetylglucosamine pyrophosphorylase, catalyzes the formation of UDP-N-                                                                                                                                                                                | -2.45 | -1.56 |



|                        |              |                                                                                                                                                                                                                                                             |                                     |                                     |
|------------------------|--------------|-------------------------------------------------------------------------------------------------------------------------------------------------------------------------------------------------------------------------------------------------------------|-------------------------------------|-------------------------------------|
|                        |              | acetylglucosamine (UDP-GlcNAc), which is important in cell wall biosynthesis, protein N-glycosylation, and GPI anchor biosynthesis; protein coding                                                                                                          |                                     |                                     |
| YMR165C                | <i>SMP2</i>  | Mg <sup>2+</sup> -dependent phosphatidate (PA) phosphatase, catalyzes the dephosphorylation of PA to yield diacylglycerol and Pi, responsible for de novo lipid synthesis; homologous to mammalian lipin 1 Pah1p; protein coding                            | 2.188                               | 1.86                                |
| YLR017W                | <i>MEU1</i>  | Methylthioadenosine phosphorylase (MTAP), catalyzes the initial step in the methionine salvage pathway; affects polyamine biosynthesis through regulation of ornithine decarboxylase (Spe1p) activity; regulates ADH2 gene expression Meu1p; protein coding | -1.64                               | -1.64                               |
| YGR078C                | <i>PAC10</i> | Pac10p Part of the heteromeric co-chaperone GimC/prefoldin complex, which promotes efficient protein folding; protein coding                                                                                                                                | -2.01                               | 1.25                                |
| YDR518W                | <i>EUG1</i>  | Eug1p Protein disulfide isomerase of the endoplasmic reticulum lumen, function overlaps with that of Pdi1p; may interact with nascent polypeptides in the ER; protein coding                                                                                | -1.82                               | -1.53                               |
| <b>YORF</b>            | <b>Gene</b>  | <b>Description</b>                                                                                                                                                                                                                                          | <b>Fold change<br/><i>myo1Δ</i></b> | <b>Fold change<br/><i>chs2Δ</i></b> |
| <b>Stress response</b> |              |                                                                                                                                                                                                                                                             |                                     |                                     |
| YCR104W                | <i>PAU3</i>  | Part of 23-member seripauperin multigene family encoded mainly in subtelomeric regions, active during alcoholic fermentation, regulated by anaerobiosis, negatively regulated by oxygen, repressed by heme Pau3p; protein coding                            | 1.75                                | 2.25                                |
| YGR008C                | <i>STF2</i>  | Protein involved in regulation of the mitochondrial F1F0-ATP synthase; Stf1p and Stf2p act as stabilizing factors that enhance inhibitory action of the Inh1p protein Stf2p; protein                                                                        | 7.29                                | 3.24                                |

|           |             |                                                                                                                                                                                                                                                                       |       |       |
|-----------|-------------|-----------------------------------------------------------------------------------------------------------------------------------------------------------------------------------------------------------------------------------------------------------------------|-------|-------|
|           |             | coding                                                                                                                                                                                                                                                                |       |       |
| YOL052C-A | <i>DDR2</i> | Ddr2p Multistress response protein, expression is activated by a variety of xenobiotic agents and environmental or physiological stresses; protein coding                                                                                                             | 3.30  | 2.12  |
| YPL223C   | <i>GRE1</i> | Gre1p Hydrophilin of unknown function; stress induced (osmotic, ionic, oxidative, heat shock and heavy metals); regulated by the HOG pathway; protein coding                                                                                                          | 9.48  | 1.68  |
| YKR072C   | <i>SIS2</i> | Negative regulatory subunit of the protein phosphatase 1 Ppz1p; involved in ion homeostasis and cell cycle progression Sis2p; protein coding                                                                                                                          | 1.89  | -1.15 |
| YIL101C   | <i>XBP1</i> | Transcriptional repressor that binds to promoter sequences of the cyclin genes, CYS3, and SMF2; expression is induced by stress or starvation during mitosis, and late in meiosis; member of the Swi4p/Mbp1p family; potential Cdc28p substrate Xbp1p; protein coding | 2.29  | 1.95  |
| YIL053W   | <i>RHR2</i> | Constitutively expressed isoform of DL-glycerol-3-phosphatase; involved in glycerol biosynthesis, induced in response to both anaerobic and, along with the Hor2p/Gpp2p isoform, osmotic stress Rhr2p; protein coding                                                 | -2.58 | -1.59 |
| YKL201C   | <i>MNN4</i> | Mnn4p Putative positive regulator of mannosylphosphate transferase (Mnn6p), involved in mannosylphosphorylation of N-linked oligosaccharides; expression increases in late-logarithmic and stationary growth phases; protein coding                                   | 2.53  | 3.12  |
| YML070W   | <i>DAK1</i> | Dak1p Dihydroxyacetone kinase, required for detoxification of dihydroxyacetone (DHA); involved in stress adaptation; protein coding                                                                                                                                   | 5.87  | 1.37  |
| YDR214W   | <i>AHA1</i> | Aha1p Co-chaperone that binds to Hsp82p and activates its ATPase activity; similar to Hch1p; expression is regulated by stresses such as heat                                                                                                                         | 3.85  | 1.39  |

|         |              |                                                                                                                                                                                                                                                                      |       |       |
|---------|--------------|----------------------------------------------------------------------------------------------------------------------------------------------------------------------------------------------------------------------------------------------------------------------|-------|-------|
|         |              | shock; protein coding                                                                                                                                                                                                                                                |       |       |
| YBR169C | <i>SSE2</i>  | Member of the heat shock protein 70 (HSP70) family; may be involved in protein folding; localized to the cytoplasm; highly homologous to the heat shock protein Sse1p Sse2p; protein coding                                                                          | 7.11  | 1.89  |
| YHR104W | <i>GRE3</i>  | Aldose reductase involved in methylglyoxal, d-xylose and arabinose metabolism; stress induced (osmotic, ionic, oxidative, heat shock, starvation and heavy metals); regulated by the HOG pathway Gre3p; protein coding                                               | 4.11  | 2.06  |
| YNL160W | <i>YGPI</i>  | Cell wall-related secretory glycoprotein; induced by nutrient deprivation-associated growth arrest and upon entry into stationary phase; may be involved in adaptation prior to stationary phase entry; has similarity to Sps100p Ygp1p; protein coding              | 7.55  | 2.15  |
| YFL020C | <i>PAU5</i>  | Part of 23-member seripauperin multigene family encoded mainly in subtelomeric regions, active during alcoholic fermentation, regulated by anaerobiosis, negatively regulated by oxygen, repressed by heme Pau5p; protein coding                                     | 1.82  | 2.62  |
| YFL014W | <i>HSP12</i> | Hsp12p Plasma membrane localized protein that protects membranes from desiccation; induced by heat shock, oxidative stress, osmostress, stationary phase entry, glucose depletion, oleate and alcohol; regulated by the HOG and Ras-Pka pathways; protein coding     | 36.77 | 17.86 |
| YFL010C | <i>WWMI</i>  | WW domain containing protein of unknown function; binds to Mca1p, a caspase-related protease that regulates H2O2-induced apoptosis; overexpression causes Gi phase growth arrest and clonal death that is suppressed by overexpression of MCA1 Wwm1p; protein coding | -1.71 | 1.16  |

|                  |              |                                                                                                                                                                                                                                                                                 |                                 |                                 |
|------------------|--------------|---------------------------------------------------------------------------------------------------------------------------------------------------------------------------------------------------------------------------------------------------------------------------------|---------------------------------|---------------------------------|
| YBR072W          | <i>HSP26</i> | Hsp26p Small heat shock protein (sHSP) with chaperone activity; forms hollow, sphere-shaped oligomers that suppress unfolded proteins aggregation; oligomer activation requires a heat-induced conformational change; not expressed in unstressed cells; protein coding         | 23.32                           | 19.36                           |
| YMR251W-A        | <i>HOR7</i>  | Hor7p Protein of unknown function; overexpression suppresses Ca <sup>2+</sup> sensitivity of mutants lacking inositol phosphorylceramide mannosyltransferases Csg1p and Csh1p; transcription is induced under hyperosmotic stress and repressed by alpha factor; protein coding | 9.17                            | 14.53                           |
| YAR020C          | <i>PAU7</i>  | Part of 23-member seripauperin multigene family, active during alcoholic fermentation, regulated by anaerobiosis, inhibited by oxygen, repressed by heme Pau7p; protein coding                                                                                                  | 1.79                            | 2.55                            |
| YMR169C          | <i>ALD3</i>  | Ald3p Cytoplasmic aldehyde dehydrogenase, involved in beta-alanine synthesis; uses NAD <sup>+</sup> as the preferred coenzyme; very similar to Ald2p; expression is induced by stress and repressed by glucose; protein coding                                                  | 41.51                           | 2.68                            |
| YGR088W          | <i>CTT1</i>  | Ctt1p Cytosolic catalase T, has a role in protection from oxidative damage by hydrogen peroxide; protein coding                                                                                                                                                                 | 26.81                           | 1.63                            |
| <b>YORF</b>      | <b>Gene</b>  | <b>Description</b>                                                                                                                                                                                                                                                              | <b>Fold change <i>myo1</i>Δ</b> | <b>Fold change <i>chs2</i>Δ</b> |
| <b>Transport</b> |              |                                                                                                                                                                                                                                                                                 |                                 |                                 |
| YPL234C          | <i>TFP3</i>  | Tfp3p Vacuolar ATPase V0 domain subunit c', involved in proton transport activity; hydrophobic integral membrane protein (proteolipid) containing four transmembrane segments; N and C termini are in the vacuolar lumen; protein coding                                        | -1.41                           | 1.70                            |
| YPL134C          | <i>ODC1</i>  | Mitochondrial inner membrane transporter, exports 2-oxoadipate and                                                                                                                                                                                                              | 1.96                            | 1.52                            |

|         |             |                                                                                                                                                                                                                                                                                              |       |      |
|---------|-------------|----------------------------------------------------------------------------------------------------------------------------------------------------------------------------------------------------------------------------------------------------------------------------------------------|-------|------|
|         |             | 2-oxoglutarate from the mitochondrial matrix to the cytosol for lysine and glutamate biosynthesis and lysine catabolism; suppresses, in multicopy, an <i>fmc1</i> null mutation  <i>Odc1p</i> ; protein coding                                                                               |       |      |
| YKL188C | <i>PXA2</i> | <i>Pxa2p</i>  Subunit of a heterodimeric peroxisomal ATP-binding cassette transporter complex ( <i>Pxa1p</i> - <i>Pxa2p</i> ), required for import of long-chain fatty acids into peroxisomes; similarity to human adrenoleukodystrophy transporter and ALD-related proteins; protein coding | 2.45  | 2.08 |
| YML054C | <i>CYB2</i> | <i>Cyb2p</i>  Cytochrome b2 (L-lactate cytochrome-c oxidoreductase), component of the mitochondrial intermembrane space, required for lactate utilization; expression is repressed by glucose and anaerobic conditions; protein coding                                                       | 5.44  | 2.47 |
| YDR276C | <i>PMP3</i> | <i>Pmp3p</i>  Small plasma membrane protein related to a family of plant polypeptides that are overexpressed under high salt concentration or low temperature, not essential for viability, deletion causes hyperpolarization of the plasma membrane potential; protein coding               | 2.62  | 1.52 |
| YGL006W | <i>PMCI</i> | <i>Pmc1p</i>  Vacuolar Ca <sup>2+</sup> ATPase involved in depleting cytosol of Ca <sup>2+</sup> ions; prevents growth inhibition by activation of calcineurin in the presence of elevated concentrations of calcium; similar to mammalian PMCA1a; protein coding                            | 2.29  | 1.54 |
| YFR053C | <i>HXK1</i> | Hexokinase isoenzyme 1, a cytosolic protein that catalyzes phosphorylation of glucose during glucose metabolism; expression is highest during growth on non-glucose carbon sources; glucose-induced repression involves the hexokinase <i>Hxk2p</i>   <i>Hxk1p</i> ; protein coding          | 14.16 | 9.38 |
| YFR033C | <i>QCR6</i> | <i>Qcr6p</i>  Subunit 6 of the ubiquinol cytochrome-c reductase complex,                                                                                                                                                                                                                     | 2.34  | 2.29 |

|         |             |                                                                                                                                                                                                                                                                                        |       |       |
|---------|-------------|----------------------------------------------------------------------------------------------------------------------------------------------------------------------------------------------------------------------------------------------------------------------------------------|-------|-------|
|         |             | which is a component of the mitochondrial inner membrane electron transport chain; highly acidic protein; required for maturation of cytochrome c1; protein coding                                                                                                                     |       |       |
| YOR317W | <i>FAA1</i> | Faa1p Long chain fatty acyl-CoA synthetase with a preference for C12:0-C16:0 fatty acids; involved in the activation of imported fatty acids; localized to both lipid particles and mitochondrial outer membrane; essential for stationary phase; protein coding                       | 2.81  | 2.43  |
| YNL142W | <i>MEP2</i> | Ammonium permease involved in regulation of pseudohyphal growth; belongs to a ubiquitous family of cytoplasmic membrane proteins that transport only ammonium (NH <sub>4</sub> <sup>+</sup> ); expression is under the nitrogen catabolite repression regulation Mep2p; protein coding | -3.16 | -1.72 |
| YBR043C | <i>QDR3</i> | Multidrug transporter of the major facilitator superfamily, required for resistance to quinidine, barban, cisplatin, and bleomycin Qdr3p; protein coding                                                                                                                               | 2.69  | 1.22  |
| YOR216C | <i>RUD3</i> | Golgi matrix protein involved in the structural organization of the cis-Golgi; interacts genetically with COG3 and USO1 Rud3p; protein coding                                                                                                                                          | -2.43 | -1.54 |
| YDL234C | <i>GYP7</i> | GTPase-activating protein for yeast Rab family members including: Ypt7p (most effective), Ypt1p, Ypt31p, and Ypt32p (in vitro); involved in vesicle mediated protein trafficking Gyp7p; protein coding                                                                                 | 1.93  | 1.74  |
| YBL045C | <i>COR1</i> | Cor1p Core subunit of the ubiquinol-cytochrome c reductase complex (bc1 complex), which is a component of the mitochondrial inner membrane electron transport chain; protein coding                                                                                                    | 2.67  | 2.60  |
| YJL166W | <i>QCR8</i> | Qcr8p Subunit 8 of ubiquinol cytochrome-c reductase complex, which is a component of the                                                                                                                                                                                               | 2.69  | 1.23  |

|         |              |                                                                                                                                                                                                                                                                      |       |       |
|---------|--------------|----------------------------------------------------------------------------------------------------------------------------------------------------------------------------------------------------------------------------------------------------------------------|-------|-------|
|         |              | mitochondrial inner membrane electron transport chain; oriented facing the intermembrane space; expression is regulated by Abf1p and Cpf1p; protein coding                                                                                                           |       |       |
| YGR172C | <i>YIP1</i>  | Integral membrane protein required for the biogenesis of ER-derived COPII transport vesicles; interacts with Yif1p and Yos1p; localizes to the Golgi, the ER, and COPII vesicles Yip1p; protein coding                                                               | -1.63 | -1.69 |
| YEL039C | <i>CYC7</i>  | Cyc7p Cytochrome c isoform 2, expressed under hypoxic conditions; electron carrier of the mitochondrial intermembrane space that transfers electrons from ubiquinone-cytochrome c oxidoreductase to cytochrome c oxidase during cellular respiration; protein coding | 5.52  | 1.17  |
| YEL031W | <i>SPF1</i>  | P-type ATPase, ion transporter of the ER membrane involved in ER function and Ca <sup>2+</sup> homeostasis; required for regulating Hmg2p degradation; confers sensitivity to a killer toxin (SMKT) produced by <i>Pichia farinosa</i> KK1 Spf1p; protein coding     | -2.33 | -1.73 |
| YAL022C | <i>FUN26</i> | Fun26p Nucleoside transporter with broad nucleoside selectivity; localized to intracellular membranes; protein coding                                                                                                                                                | -1.67 | -1.14 |
| YDR534C | <i>FIT1</i>  | Fit1p Mannoprotein that is incorporated into the cell wall via a glycosylphosphatidylinositol (GPI) anchor, involved in the retention of siderophore-iron in the cell wall; protein coding                                                                           | -4.60 | 1.17  |
| YLL043W | <i>FPS1</i>  | Fps1p Plasma membrane glycerol channel, member of the major intrinsic protein (MIP) family of channel proteins; involved in efflux of glycerol and in uptake of the trivalent metalloids arsenite and antimonite; protein coding                                     | 2.79  | 1.94  |
| YDR513W | <i>TTR1</i>  | Cytoplasmic glutaredoxin, thioltransferase, glutathione-                                                                                                                                                                                                             | 1.74  | 1.39  |

|                                |             |                                                                                                                                                                                                                                              |                                 |                                 |
|--------------------------------|-------------|----------------------------------------------------------------------------------------------------------------------------------------------------------------------------------------------------------------------------------------------|---------------------------------|---------------------------------|
|                                |             | dependent disulfide oxidoreductase involved in maintaining redox state of target proteins, also exhibits glutathione peroxidase activity, expression induced in response to stress Grx2p; protein coding                                     |                                 |                                 |
| <b>YORF</b>                    | <b>Gene</b> | <b>Description</b>                                                                                                                                                                                                                           | <b>Fold change <i>myo1Δ</i></b> | <b>Fold change <i>chs2Δ</i></b> |
| <b>Carbohydrate metabolism</b> |             |                                                                                                                                                                                                                                              |                                 |                                 |
| YIL155C                        | <i>GUT2</i> | Gut2p Mitochondrial glycerol-3-phosphate dehydrogenase; expression is repressed by both glucose and cAMP and derepressed by non-fermentable carbon sources in a Snf1p, Rsf1p, Hap2/3/4/5 complex dependent manner; protein coding            | 3.77                            | 11.97                           |
| YKR058W                        | <i>GLG1</i> | Glg1p Self-glucosylating initiator of glycogen synthesis, also glucosylates n-dodecyl-beta-D-maltoside; similar to mammalian glycogenin; protein coding                                                                                      | 4.55                            | 1.93                            |
| YNR034W                        | <i>SOL1</i> | Protein with a possible role in tRNA export; shows similarity to 6-phosphogluconolactonase non-catalytic domains but does not exhibit this enzymatic activity; homologous to Sol2p, Sol3p, and Sol4p Sol1p; protein coding                   | 2.09                            | 1.22                            |
| YGL156W                        | <i>AMSI</i> | Ams1p Vacuolar alpha mannosidase, involved in free oligosaccharide (fOS) degradation; delivered to the vacuole in a novel pathway separate from the secretory pathway; protein coding                                                        | 2.77                            | 8.38                            |
| YCL040W                        | <i>GLK1</i> | Glk1p Glucokinase, catalyzes the phosphorylation of glucose at C6 in the first irreversible step of glucose metabolism; one of three glucose phosphorylating enzymes; expression regulated by non-fermentable carbon sources; protein coding | 6.82                            | 5.55                            |
| YKL127W                        | <i>PGMI</i> | Pgm1p Phosphoglucomutase, minor isoform; catalyzes the conversion from glucose-1-phosphate to glucose-                                                                                                                                       | -2.68                           | -1.92                           |



|         |              |                                                                                                                                                                                                                                                                        |       |       |
|---------|--------------|------------------------------------------------------------------------------------------------------------------------------------------------------------------------------------------------------------------------------------------------------------------------|-------|-------|
|         |              | 6-phosphate, which is a key step in hexose metabolism; protein coding                                                                                                                                                                                                  |       |       |
| YGL028C | <i>SCW11</i> | Cell wall protein with similarity to glucanases; may play a role in conjugation during mating based on its regulation by Ste12p Scw11p; protein coding                                                                                                                 | -1.89 | 1.09  |
| YKL035W | <i>UGP1</i>  | UDP-glucose pyrophosphorylase (UGPase), catalyses the reversible formation of UDP-Glc from glucose 1-phosphate and UTP, involved in a wide variety of metabolic pathways, expression modulated by Pho85p through Pho4p Ugp1p; protein coding                           | 9.13  | 7.22  |
| YBR126C | <i>TPS1</i>  | Synthase subunit of trehalose-6-phosphate synthase/phosphatase complex, which synthesizes the storage carbohydrate trehalose; also found in a monomeric form; expression is induced by the stress response and repressed by the Ras-cAMP pathway Tps1p; protein coding | 5.30  | 3.78  |
| YDR074W | <i>TPS2</i>  | Phosphatase subunit of the trehalose-6-phosphate synthase/phosphatase complex, which synthesizes the storage carbohydrate trehalose; expression is induced by stress conditions and repressed by the Ras-cAMP pathway Tps2p; protein coding                            | 7.47  | 2.84  |
| YGR282C | <i>BGL2</i>  | Bgl2p Endo-beta-1,3-glucanase, major protein of the cell wall, involved in cell wall maintenance; protein coding                                                                                                                                                       | 2.08  | 2.74  |
| YDR001C | <i>NTH1</i>  | Neutral trehalase, degrades trehalose; required for thermotolerance and may mediate resistance to other cellular stresses; may be phosphorylated by Cdc28p Nth1p; protein coding                                                                                       | 5.35  | 1.69  |
| YMR305C | <i>SCW10</i> | Cell wall protein with similarity to glucanases; may play a role in conjugation during mating based on mutant phenotype and its regulation by Ste12p Scw10p; protein coding                                                                                            | -4.20 | -2.27 |

|         |              |                                                                                                                                                                                                                                                           |       |       |
|---------|--------------|-----------------------------------------------------------------------------------------------------------------------------------------------------------------------------------------------------------------------------------------------------------|-------|-------|
| YPR184W | <i>GDB1</i>  | Gdb1p Glycogen debranching enzyme containing glucanotranferase and alpha-1,6-amyloglucosidase activities, required for glycogen degradation; phosphorylated in mitochondria; protein coding                                                               | 7.27  | 3.56  |
| YER054C | <i>GIP2</i>  | Gip2p Putative regulatory subunit of the protein phosphatase Glc7p, involved in glycogen metabolism; contains a conserved motif (GVNK motif) that is also found in Gac1p, Pig1p, and Pig2p; protein coding                                                | 3.90  | 2.11  |
| YPR160W | <i>GPH1</i>  | Gph1p Non-essential glycogen phosphorylase required for the mobilization of glycogen, activity is regulated by cyclic AMP-mediated phosphorylation, expression is regulated by stress-response elements and by the HOG MAP kinase pathway; protein coding | 18.84 | 29.41 |
| YER003C | <i>PMI40</i> | Mannose-6-phosphate isomerase, catalyzes the interconversion of fructose-6-P and mannose-6-P; required for early steps in protein mannosylation Pmi40p; protein coding                                                                                    | -2.03 | -2.31 |
| YGR143W | <i>SKN1</i>  | Protein involved in sphingolipid biosynthesis; type II membrane protein with similarity to Kre6p Skn1p; protein coding                                                                                                                                    | 2.31  | 1.08  |
| YEL040W | <i>UTR2</i>  | Cell wall protein that functions in the transfer of chitin to beta(1-6)glucan; putative chitin transglycosidase; glycosylphosphatidylinositol (GPI)-anchored protein localized to the bud neck; has a role in cell wall maintenance Utr2p; protein coding | -4.13 | 1.04  |
| YEL011W | <i>GLC3</i>  | Glc3p Glycogen branching enzyme, involved in glycogen accumulation; green fluorescent protein (GFP)-fusion protein localizes to the cytoplasm in a punctate pattern; protein coding                                                                       | 7.34  | 36.62 |
| YAL017W | <i>PSK1</i>  | One of two (see also PSK2) PAS domain containing S/T protein kinases; coordinately regulates                                                                                                                                                              | 1.61  | 1.66  |

|                            |              |                                                                                                                                                                                                                                                   |                                 |                                 |
|----------------------------|--------------|---------------------------------------------------------------------------------------------------------------------------------------------------------------------------------------------------------------------------------------------------|---------------------------------|---------------------------------|
|                            |              | protein synthesis and carbohydrate metabolism and storage in response to a unknown metabolite that reflects nutritional status Psk1p; protein coding                                                                                              |                                 |                                 |
| <b>YORF</b>                | <b>Gene</b>  | <b>Description</b>                                                                                                                                                                                                                                | <b>Fold change <i>myo1Δ</i></b> | <b>Fold change <i>chs2Δ</i></b> |
| <b>Protein degradation</b> |              |                                                                                                                                                                                                                                                   |                                 |                                 |
| YLR120C                    | <i>YPS1</i>  | Aspartic protease, attached to the plasma membrane via a glycosylphosphatidylinositol (GPI) anchor Yps1p; protein coding                                                                                                                          | 1.62                            | 1.29                            |
| YMR174C                    | <i>PAI3</i>  | Cytoplasmic proteinase A (Pep4p) inhibitor, dependent on Pbs2p and Hog1p protein kinases for osmotic induction; intrinsically unstructured, N-terminal half becomes ordered in the active site of proteinase A upon contact Pai3p; protein coding | 4.28                            | 1.64                            |
| YEL060C                    | <i>PRB1</i>  | Prb1p Vacuolar proteinase B (yscB), a serine protease of the subtilisin family; involved in protein degradation in the vacuole and required for full protein degradation during sporulation; protein coding                                       | 2.62                            | 4.89                            |
| YPR191W                    | <i>QCR2</i>  | Qcr2p Subunit 2 of the ubiquinol cytochrome-c reductase complex, which is a component of the mitochondrial inner membrane electron transport chain; phosphorylated; transcription is regulated by Hap1p, Hap2p/Hap3p, and heme; protein coding    | 3.14                            | 3.81                            |
| YMR304W                    | <i>UBP15</i> | Ubiquitin-specific protease that may play a role in ubiquitin precursor processing Ubp15p; protein coding                                                                                                                                         | 1.47                            | 1.06                            |
| YOR219C                    | <i>STE13</i> | Dipeptidyl aminopeptidase, Golgi integral membrane protein that cleaves on the carboxyl side of repeating -X-Ala- sequences, required for maturation of alpha factor, transcription is induced by a-factor Ste13p; protein coding                 | 1.68                            | 1.07                            |

|                      |              |                                                                                                                                                                                                                                                              |                                     |                                     |
|----------------------|--------------|--------------------------------------------------------------------------------------------------------------------------------------------------------------------------------------------------------------------------------------------------------------|-------------------------------------|-------------------------------------|
| YBR105C              | <i>VID24</i> | Peripheral membrane protein located at Vid (vacuole import and degradation) vesicles; regulates fructose-1,6-bisphosphatase (FBPase) targeting to the vacuole; involved in proteasome-dependent catabolite degradation of FBPase Vid24p; protein coding      | 2.41                                | -1.18                               |
| YKL034W              | <i>TUL1</i>  | Golgi-localized RING-finger ubiquitin ligase (E3), involved in ubiquitinating and sorting membrane proteins that contain polar transmembrane domains to multivesicular bodies for delivery to the vacuole for quality control purposes Tul1p; protein coding | 1.93                                | 1.10                                |
| YGL227W              | <i>VID30</i> | Protein involved in proteasome-dependent catabolite degradation of fructose-1,6-bisphosphatase (FBPase); shifts the balance of nitrogen metabolism toward the production of glutamate; localized to the nucleus and the cytoplasm Vid30p; protein coding     | 1.73                                | 1.34                                |
| <b>YORF</b>          | <b>Gene</b>  | <b>Description</b>                                                                                                                                                                                                                                           | <b>Fold change<br/><i>myo1</i>Δ</b> | <b>Fold change<br/><i>chs2</i>Δ</b> |
| <b>Transcription</b> |              |                                                                                                                                                                                                                                                              |                                     |                                     |
| YDL150W              | <i>RPC53</i> | RNA polymerase III subunit C53 Rpc53p; protein coding                                                                                                                                                                                                        | -1.74                               | -1.95                               |
| YPR187W              | <i>RPO26</i> | RNA polymerase subunit ABC23, common to RNA polymerases I, II, and III; part of central core; similar to bacterial omega subunit Rpo26p; protein coding                                                                                                      | -2.18                               | -2.13                               |
| YLR228C              | <i>ECM22</i> | Ecm22p Sterol regulatory element binding protein, regulates transcription of the sterol biosynthetic genes ERG2 and ERG3; member of the fungus-specific Zn[2]-Cys[6] binuclear cluster family of transcription factors; homologous to Upc2p; protein coding  | 1.68                                | 4.53                                |
| YKL185W              | <i>ASH1</i>  | Ash1p Zinc-finger inhibitor of HO transcription; mRNA is localized and translated in the distal tip of anaphase                                                                                                                                              | -2.05                               | 1.73                                |

|                       |               |                                                                                                                                                                                                                                                                    |                                     |                                     |
|-----------------------|---------------|--------------------------------------------------------------------------------------------------------------------------------------------------------------------------------------------------------------------------------------------------------------------|-------------------------------------|-------------------------------------|
|                       |               | cells, resulting in accumulation of Ash1p in daughter cell nuclei and inhibition of HO expression; potential Cdc28p substrate; protein coding                                                                                                                      |                                     |                                     |
| YOL005C               | <i>RPB11</i>  | RNA polymerase II subunit B12.5; part of central core; similar to Rpc19p and bacterial alpha subunit Rpb11p; protein coding                                                                                                                                        | -2.02                               | -1.17                               |
|                       |               |                                                                                                                                                                                                                                                                    |                                     |                                     |
| <b>YORF</b>           | <b>Gene</b>   | <b>Description</b>                                                                                                                                                                                                                                                 | <b>Fold change<br/><i>myo1Δ</i></b> | <b>Fold change<br/><i>chs2Δ</i></b> |
| <b>DNA metabolism</b> |               |                                                                                                                                                                                                                                                                    |                                     |                                     |
| YJL080C               | <i>SCP160</i> | Essential RNA-binding G protein effector of mating response pathway, mainly associated with nuclear envelope and ER, interacts in mRNA-dependent manner with translating ribosomes via multiple KH domains, similar to vertebrate vigilins Scp160p; protein coding | -2.64                               | -2.29                               |
| YDL227C               | <i>HO</i>     | Hop Site-specific endonuclease required for gene conversion at the MAT locus (homothallic switching) through the generation of a ds DNA break; expression restricted to mother cells in late G1 as controlled by Swi4p-Swi6p, Swi5p and Ash1p; protein coding      | -4.15                               | -1.80                               |
| YER120W               | <i>SCS2</i>   | Integral ER membrane protein that regulates phospholipid metabolism via an interaction with the FFAT motif of Opi1p, also involved in telomeric silencing, disruption causes inositol auxotrophy above 34 degrees C, VAP homolog Scs2p; protein coding             | -1.54                               | -1.44                               |
| YOR191W               | <i>RIS1</i>   | Member of the SWI/SNF family of DNA-dependent ATPases, plays a role in antagonizing silencing during mating-type switching, contains an N-terminal domain that interacts with Sir4p and a C-terminal SNF2 domain Ris1p; protein coding                             | 1.49                                | 1.13                                |

|         |              |                                                                                                                                                                                                                                                                        |       |       |
|---------|--------------|------------------------------------------------------------------------------------------------------------------------------------------------------------------------------------------------------------------------------------------------------------------------|-------|-------|
| YNL030W | <i>HHF2</i>  | Hhf2p One of two identical histone H4 proteins (see also HHF1); core histone required for chromatin assembly and chromosome function; contributes to telomeric silencing; N-terminal domain involved in maintaining genomic integrity; protein coding                  | -1.89 | -1.24 |
| YER171W | <i>RAD3</i>  | 5' to 3' DNA helicase, involved in nucleotide excision repair and transcription; subunit of RNA polymerase II transcription initiation factor TFIIH; subunit of Nucleotide Excision Repair Factor 3 (NEF3); homolog of human XPD protein Rad3p; protein coding         | -1.75 | -1.52 |
| YDR097C | <i>MSH6</i>  | Msh6p Protein required for mismatch repair in mitosis and meiosis, forms a complex with Msh2p to repair both single-base & insertion-deletion mispairs; potentially phosphorylated by Cdc28p; protein coding                                                           | -2.21 | -2.03 |
| YBR214W | <i>SDS24</i> | One of two <i>S. cerevisiae</i> homologs (Sds23p and Sds24p) of the <i>Schizosaccharomyces pombe</i> Sds23 protein, which genetic studies have implicated in APC/cyclosome regulation; may play an indirect role in fluid-phase endocytosis Sds24p; protein coding     | 2.59  | 8.02  |
| YBR245C | <i>ISWI</i>  | Isw1p Member of the imitation-switch (ISWI) class of ATP-dependent chromatin remodeling complexes; ATPase that forms a complex with Ioc2p and Ioc4p to regulate transcription elongation, and a complex with Ioc3p to repress transcription initiation; protein coding | -1.65 | -1.58 |
| YML069W | <i>POB3</i>  | Pob3p Subunit of the heterodimeric FACT complex (Spt16p-Pob3p), which facilitates RNA Pol II transcription elongation through nucleosomes by destabilizing and then reassembling nucleosome structure; interacts with DNA                                              | -1.79 | -2.04 |

|                   |             |                                                                                                                                                                                                                                                                  |                                     |                                     |
|-------------------|-------------|------------------------------------------------------------------------------------------------------------------------------------------------------------------------------------------------------------------------------------------------------------------|-------------------------------------|-------------------------------------|
|                   |             | polymerase alpha (Pol1p); protein coding                                                                                                                                                                                                                         |                                     |                                     |
| YGL213C           | <i>SKI8</i> | Protein involved in exosome mediated 3' to 5' mRNA degradation and translation inhibition of non-poly(A) mRNAs as well as double-strand break formation during meiotic recombination; required for repressing propagation of dsRNA viruses Ski8p; protein coding | -1.49                               | -1.14                               |
| <b>YORF</b>       | <b>Gene</b> | <b>Description</b>                                                                                                                                                                                                                                               | <b>Fold change<br/><i>myo1Δ</i></b> | <b>Fold change<br/><i>chs2Δ</i></b> |
| <b>Cell cycle</b> |             |                                                                                                                                                                                                                                                                  |                                     |                                     |
| YDL055C           | <i>PSA1</i> | GDP-mannose pyrophosphorylase (mannose-1-phosphate guanyltransferase), synthesizes GDP-mannose from GTP and mannose-1-phosphate in cell wall biosynthesis; required for normal cell wall structure Psa1p; protein coding                                         | -3.51                               | 3.43                                |
| YGR041W           | <i>BUD9</i> | Bud9p Protein involved in bud-site selection; diploid mutants display a unipolar budding pattern instead of the wild-type bipolar pattern, and bud at the distal pole; protein coding                                                                            | -3.01                               | 1.21                                |
| YMR135C           | <i>GID8</i> | Gid8p Protein of unknown function, involved in proteasome-dependent catabolite inactivation of fructose-1,6-bisphosphatase; contains LisH and CTLH domains, like Vid30p; dosage-dependent regulator of START; protein coding                                     | -2.39                               | 2.17                                |
| YAL034W-A         | <i>MTW1</i> | Essential component of the MIND kinetochore complex (Mtw1p Including Nnf1p-Nsl1p-Dsn1p) which joins kinetochore subunits contacting DNA to those contacting microtubules; critical to kinetochore assembly Mtw1p; protein coding                                 | -1.68                               | -1.24                               |
| YLR353W           | <i>BUD8</i> | Bud8p Protein involved in bud-site selection; diploid mutants display a unipolar budding pattern instead of the wild-type bipolar pattern, and bud at the proximal pole; protein coding                                                                          | -1.34                               | -1.20                               |

|                          |              |                                                                                                                                                                                                                                                                         |                                     |                                     |
|--------------------------|--------------|-------------------------------------------------------------------------------------------------------------------------------------------------------------------------------------------------------------------------------------------------------------------------|-------------------------------------|-------------------------------------|
| YNL289W                  | <i>PCL1</i>  | Pcl1p Pho85 cyclin of the Pcl1,2-like subfamily, involved in entry into the mitotic cell cycle and regulation of morphogenesis, localizes to sites of polarized cell growth; protein coding                                                                             | -3.21                               | 2.08                                |
| YNR027W                  | <i>BUD17</i> | Bud17p Protein involved in bud-site selection; diploid mutants display a random budding pattern instead of the wild-type bipolar pattern; protein coding                                                                                                                | -1.85                               | 2.26                                |
| <b>YORF</b>              | <b>Gene</b>  | <b>Description</b>                                                                                                                                                                                                                                                      | <b>Fold change<br/><i>myo1</i>Δ</b> | <b>Fold change<br/><i>chs2</i>Δ</b> |
| <b>Protein transport</b> |              |                                                                                                                                                                                                                                                                         |                                     |                                     |
| YDR358W                  | <i>GGAI</i>  | Gga1p Golgi-localized protein with homology to gamma-adaptin, interacts with and regulates Arf1p and Arf2p in a GTP-dependent manner in order to facilitate traffic through the late Golgi; protein coding                                                              | 3.35                                | 3.93                                |
| YDR202C                  | <i>RAV2</i>  | Rav2p Subunit of RAVE (Rav1p, Rav2p, Skp1p), a complex that associates with the V1 domain of the vacuolar membrane (H <sup>+</sup> )-ATPase (V-ATPase) and promotes assembly and reassembly of the holoenzyme; protein coding                                           | 2.00                                | -1.09                               |
| YDR200C                  | <i>VPS64</i> | Cytoplasmic protein required for cytoplasm to vacuole targeting of proteins; forms a complex with Far3p, Far7p, Far10p, and Far11p that is involved in pheromone-induced cell cycle arrest; also localized to the endoplasmic reticulum membrane Vps64p; protein coding | 1.64                                | 1.92                                |
| YFL045C                  | <i>SEC53</i> | Phosphomannomutase, involved in synthesis of GDP-mannose and dolichol-phosphate-mannose; required for folding and glycosylation of secretory proteins in the ER lumen Sec53p; protein coding                                                                            | -2.67                               | -2.68                               |
| YJR135W-A                | <i>TIM8</i>  | Mitochondrial intermembrane space protein mediating import and insertion of polytopic inner                                                                                                                                                                             | -2.50                               | -1.52                               |



|         |               |                                                                                                                                                                                                                                                                       |       |       |
|---------|---------------|-----------------------------------------------------------------------------------------------------------------------------------------------------------------------------------------------------------------------------------------------------------------------|-------|-------|
|         |               | membrane proteins; homolog of human DDP1 (deafness dystonia peptide 1) which is mutated in the X-linked Mohr-Tranebjaerg syndrome Tim8p; protein coding                                                                                                               |       |       |
| YLR259C | <i>HSP60</i>  | Hsp60p Tetradecameric mitochondrial chaperonin required for ATP-dependent folding of precursor polypeptides and complex assembly; prevents aggregation and mediates protein refolding after heat shock; role in mtDNA transmission; phosphorylated; protein coding    | 2.83  | -1.69 |
| YBL075C | <i>SSA3</i>   | ATPase involved in protein folding and the response to stress; plays a role in SRP-dependent cotranslational protein-membrane targeting and translocation; member of the heat shock protein 70 (HSP70) family; localized to the cytoplasm Ssa3p; protein coding       | 3.812 | 1.23  |
| YPR149W | <i>NCE102</i> | Nce102p Protein of unknown function; contains transmembrane domains; involved in secretion of proteins that lack classical secretory signal sequences; component of the detergent-insoluble glycolipid-enriched complexes (DIGs); protein coding                      | 6.22  | 8.35  |
| YER008C | <i>SEC3</i>   | Non-essential subunit of the exocyst complex (Sec3p, Sec5p, Sec6p, Sec8p, Sec10p, Sec15p, Exo70p, Exo84p) which mediates targeting of post-Golgi vesicles to sites of active exocytosis; Sec3p specifically is a spatial landmark for secretion Sec3p; protein coding | 1.49  | -1.31 |
| YLR066W | <i>SPC3</i>   | Spc3p Subunit of signal peptidase complex (Spc1p, Spc2p, Spc3p, Sec11p), which catalyzes cleavage of N-terminal signal sequences of proteins targeted to the secretory pathway; homologous to mammalian SPC22/23; protein coding                                      | -2.20 | -1.42 |
| YGR082W | <i>TOM20</i>  | Component of the TOM (translocase of outer membrane) complex                                                                                                                                                                                                          | -1.82 | -1.29 |

|                       |             | responsible for recognition and initial import steps for all mitochondrially directed proteins; acts as a receptor for incoming precursor proteins Tom20p; protein coding                                                                        |                                     |                                     |
|-----------------------|-------------|--------------------------------------------------------------------------------------------------------------------------------------------------------------------------------------------------------------------------------------------------|-------------------------------------|-------------------------------------|
| <b>YORF</b>           | <b>Gene</b> | <b>Description</b>                                                                                                                                                                                                                               | <b>Fold change<br/><i>myo1</i>Δ</b> | <b>Fold change<br/><i>chs2</i>Δ</b> |
| <b>RNA processing</b> |             |                                                                                                                                                                                                                                                  |                                     |                                     |
| YDL051W               | <i>LHP1</i> | Lhp1p RNA binding protein required for maturation of tRNA and snRNA precursors; acts as a molecular chaperone for RNAs transcribed by polymerase III; homologous to human La (SS-B) autoantigen; protein coding                                  | -2.05                               | -1.87                               |
| YGR129W               | <i>SYF2</i> | Component of the spliceosome complex involved in pre-mRNA splicing; involved in regulation of cell cycle progression Syf2p; protein coding                                                                                                       | 2.06                                | 1.85                                |
| YLR107W               | <i>REX3</i> | RNA exonuclease; required for maturation of the RNA component of RNase MRP; functions redundantly with Rnh70p and Rex2p in processing of U5 snRNA and RNase P RNA; member of RNase D family of exonucleases Rex3p; protein coding                | 1.95                                | -1.29                               |
| YER032W               | <i>FIR1</i> | Fir1p Protein involved in 3' mRNA processing, interacts with Ref2p; potential Cdc28p substrate; protein coding                                                                                                                                   | -1.74                               | 2.52                                |
| YFL001W               | <i>DEG1</i> | Deg1p Non-essential tRNA;pseudouridine synthase, introduces pseudouridines at position 38 or 39 in tRNA, important for maintenance of translation efficiency and normal cell growth, localizes to both the nucleus and cytoplasm; protein coding | -1.36                               | 1.42                                |
| YHR163W               | <i>SOL3</i> | 6-phosphogluconolactonase, catalyzes the second step of the pentose phosphate pathway; weak multicopy suppressor of los1-1 mutation; homologous to Sol2p and                                                                                     | -2.14                               | -1.27                               |

|                            |             |                                                                                                                                                                                                                                                                                    |                                     |                                     |
|----------------------------|-------------|------------------------------------------------------------------------------------------------------------------------------------------------------------------------------------------------------------------------------------------------------------------------------------|-------------------------------------|-------------------------------------|
|                            |             | Sol1p Sol3p; protein coding                                                                                                                                                                                                                                                        |                                     |                                     |
| YIL038C                    | <i>NOT3</i> | Not3p Subunit of the CCR4-NOT complex, which is a global transcriptional regulator with roles in transcription initiation and elongation and in mRNA degradation; protein coding                                                                                                   | 1.58                                | 1.59                                |
| <b>YORF</b>                | <b>Gene</b> | <b>Description</b>                                                                                                                                                                                                                                                                 | <b>Fold change<br/><i>myo1</i>Δ</b> | <b>Fold change<br/><i>chs2</i>Δ</b> |
| <b>Signal transduction</b> |             |                                                                                                                                                                                                                                                                                    |                                     |                                     |
| YNL173C                    | <i>MDG1</i> | Mdg1p Plasma membrane protein involved in G-protein mediated pheromone signaling pathway; overproduction suppresses <i>bem1</i> mutations; protein coding                                                                                                                          | 2.07                                | 1.88                                |
| YDR085C                    | <i>AFR1</i> | Afr1p Alpha-factor pheromone receptor regulator, negatively regulates pheromone receptor signaling; required for normal mating projection ( <i>shmoo</i> ) formation; required for Spa2p to recruit Mpk1p to <i>shmoo</i> tip during mating; interacts with Cdc12p; protein coding | 3.65                                | 1.44                                |
| YER118C                    | <i>SHO1</i> | Sho1p Transmembrane osmosensor, participates in activation of both the Cdc42p- and MAP kinase-dependent filamentous growth pathway and the high-osmolarity glycerol response pathway; protein coding                                                                               | -1.74                               | -1.02                               |
| YOR134W                    | <i>BAG7</i> | Bag7p Rho GTPase activating protein (RhoGAP), stimulates the intrinsic GTPase activity of Rho1p, which plays a role in actin cytoskeleton organization and control of cell wall synthesis; structurally and functionally related to Sac7p; protein coding                          | 1.89                                | 2.59                                |
| YOR101W                    | <i>RAS1</i> | GTPase involved in G-protein signaling in the adenylate cyclase activating pathway, plays a role in cell proliferation; localized to the plasma membrane; homolog of mammalian RAS proto-oncogenes Ras1p; protein coding                                                           | -2.29                               | -2.60                               |

|                        |              |                                                                                                                                                                                                                                                                        |                                     |                                     |
|------------------------|--------------|------------------------------------------------------------------------------------------------------------------------------------------------------------------------------------------------------------------------------------------------------------------------|-------------------------------------|-------------------------------------|
| YJL005W                | <i>CYR15</i> | Adenylate cyclase, required for cAMP production and cAMP-dependent protein kinase signaling; the cAMP pathway controls a variety of cellular processes, including metabolism, cell cycle, stress response, stationary phase, and sporulation Cyr1p; protein coding     | 2.58                                | 3.71                                |
| <b>YORF</b>            | <b>Gene</b>  | <b>Description</b>                                                                                                                                                                                                                                                     | <b>Fold change<br/><i>myo1Δ</i></b> | <b>Fold change<br/><i>chs2Δ</i></b> |
| <b>DNA replication</b> |              |                                                                                                                                                                                                                                                                        |                                     |                                     |
| YDR054C                | <i>CDC34</i> | Cdc34p Ubiquitin-conjugating enzyme (E2) and catalytic subunit of SCF ubiquitin-protein ligase complex (together with Skp1p, Rbx1p, Cdc53p, and an F-box protein) that regulates cell cycle progression by targeting key substrates for degradation; protein coding    | 1.64                                | 1.95                                |
| YOR074C                | <i>CDC21</i> | Cdc21p Thymidylate synthase, required for de novo biosynthesis of pyrimidine deoxyribonucleotides; expression is induced at G1/S; protein coding                                                                                                                       | -2.46                               | -1.40                               |
| <b>YORF</b>            | <b>Gene</b>  | <b>Description</b>                                                                                                                                                                                                                                                     | <b>Fold change<br/><i>myo1Δ</i></b> | <b>Fold change<br/><i>chs2Δ</i></b> |
| <b>Sporulation</b>     |              |                                                                                                                                                                                                                                                                        |                                     |                                     |
| YNL202W                | <i>SPS19</i> | Peroxisomal 2,4-dienoyl-CoA reductase, auxiliary enzyme of fatty acid beta-oxidation; homodimeric enzyme required for growth and sporulation on petroselineate medium; expression induced during late sporulation and in the presence of oleate Sps19p; protein coding |                                     | 3.29 1.24                           |
| <b>YORF</b>            | <b>Gene</b>  | <b>Description</b>                                                                                                                                                                                                                                                     | <b>Fold change<br/><i>myo1Δ</i></b> | <b>Fold change<br/><i>chs2Δ</i></b> |
| DNA damage response    |              |                                                                                                                                                                                                                                                                        |                                     |                                     |
| YNL178W                | <i>RPS3</i>  | Protein component of the small (40S) ribosomal subunit, has apurinic/aprimidinic (AP) endonuclease activity; essential for                                                                                                                                             | -3.21                               | -2.81                               |

|                            |              |                                                                                                                                                                                                                                                   |                                 |                                 |
|----------------------------|--------------|---------------------------------------------------------------------------------------------------------------------------------------------------------------------------------------------------------------------------------------------------|---------------------------------|---------------------------------|
|                            |              | viability; has similarity to E. coli S3 and rat S3 ribosomal proteins Rps3p; protein coding                                                                                                                                                       |                                 |                                 |
| <b>Autophagy</b>           |              |                                                                                                                                                                                                                                                   |                                 |                                 |
| YPL154C                    | <i>PEP4</i>  | Pep4p Vacuolar aspartyl protease (proteinase A), required for the posttranslational precursor maturation of vacuolar proteinases; important for protein turnover after oxidative damage; synthesized as a zymogen, self-activates; protein coding | 3.16                            | 5.40                            |
| YDL149W                    | <i>ATG9</i>  | Transmembrane protein involved in forming Cvt and autophagic vesicles; cycles between the phagophore assembly site (PAS) and other cytosolic punctate structures, not found in autophagosomes; may be involved in membrane delivery to the PAS.   | 1.40                            | 1.66                            |
| <b>DNA recombination</b>   |              |                                                                                                                                                                                                                                                   |                                 |                                 |
| YML128C                    | <i>MSC1</i>  | Msc1p Protein of unknown function; mutant is defective in directing meiotic recombination events to homologous chromatids; the authentic, non-tagged protein is detected in highly purified mitochondria and is phosphorylated; protein coding    | 21.10                           | 10.66                           |
| <b>Ribosome biogenesis</b> |              |                                                                                                                                                                                                                                                   |                                 |                                 |
| YOL040C                    | <i>RPS15</i> | Protein component of the small (40S) ribosomal subunit; has similarity to E. coli S19 and rat S15 ribosomal proteins Rps15p; protein coding                                                                                                       | -2.47                           | -2.64                           |
| <b>YORF</b>                | <b>Gene</b>  | <b>Description</b>                                                                                                                                                                                                                                | <b>Fold change <i>myo1</i>Δ</b> | <b>Fold change <i>chs2</i>Δ</b> |
| <b>DNA repair</b>          |              |                                                                                                                                                                                                                                                   |                                 |                                 |
| YIR002C                    | <i>MPH1</i>  | Member of the DEAH family of helicases, functions in an error-free DNA damage bypass pathway that involves homologous recombination, mutations confer a mutator phenotype Mph1p; protein coding                                                   | 1.97                            | 1.71                            |

|                                          |               |                                                                                                                                                                                                                                                                         |                                     |                                     |
|------------------------------------------|---------------|-------------------------------------------------------------------------------------------------------------------------------------------------------------------------------------------------------------------------------------------------------------------------|-------------------------------------|-------------------------------------|
| YHR154W                                  | <i>RTT107</i> | Protein implicated in Mms22-dependent DNA repair during S phase, DNA damage induces phosphorylation by Mec1p at one or more SQ/TQ motifs; interacts with Mms22p and Slx4p; has four BRCT domains; has a role in regulation of Ty1 transposition Rtt107p; protein coding | -2.13                               | -1.21                               |
| YMR173W                                  | <i>DDR48</i>  | DNA damage-responsive protein, expression is increased in response to heat-shock stress or treatments that produce DNA lesions; contains multiple repeats of the amino acid sequence NNNDSYGS Ddr48p; protein coding                                                    | 4.10                                | 2.67                                |
| <b>YORF</b>                              | <b>Gene</b>   | <b>Description</b>                                                                                                                                                                                                                                                      | <b>Fold change<br/><i>myo1Δ</i></b> | <b>Fold change<br/><i>chs2Δ</i></b> |
| <b>Protein aminoacid phosphorylation</b> |               |                                                                                                                                                                                                                                                                         |                                     |                                     |
| YLL019C                                  | <i>KNS1</i>   | Kns1p Nonessential putative protein kinase of unknown cellular role; member of the LAMMER family of protein kinases, which are serine/threonine kinases also capable of phosphorylating tyrosine residues; protein coding                                               | 2.24                                | 1.79                                |
| YJR059W                                  | <i>PTK2</i>   | Ptk2p Putative serine/threonine protein kinase involved in regulation of ion transport across plasma membrane; enhances spermine uptake; protein coding                                                                                                                 | 2.88                                | 1.76                                |
| YJL164C                                  | <i>TPK1</i>   | Tpk1p cAMP-dependent protein kinase catalytic subunit; promotes vegetative growth in response to nutrients via the Ras-cAMP signaling pathway; inhibited by regulatory subunit Bcy1p in the absence of cAMP; partially redundant with Tpk2p and Tpk3p; protein coding   | 2.35                                | 2.25                                |
| YJL141C                                  | <i>YAK1</i>   | Serine-threonine protein kinase that is part of a glucose-sensing system involved in growth control in response to glucose availability;                                                                                                                                | 2.46                                | 1.21                                |

|                |              |                                                                                                                                                                                                                             |                                     |                                     |
|----------------|--------------|-----------------------------------------------------------------------------------------------------------------------------------------------------------------------------------------------------------------------------|-------------------------------------|-------------------------------------|
|                |              | translocates from the cytoplasm to the nucleus and phosphorylates Pop2p in response to a glucose signal Yak1p; protein coding                                                                                               |                                     |                                     |
| YDR507C        | <i>GIN4</i>  | Gin4p Protein kinase involved in bud growth and assembly of the septin ring, proposed to have kinase-dependent and kinase-independent activities; undergoes autophosphorylation; similar to Kcc4p and Hsl1p; protein coding | -1.94                               | -1.27                               |
| <b>YORF</b>    | <b>Gene</b>  | <b>Description</b>                                                                                                                                                                                                          | <b>Fold change<br/><i>myo1</i>Δ</b> | <b>Fold change<br/><i>chs2</i>Δ</b> |
| <b>Unknown</b> |              |                                                                                                                                                                                                                             |                                     |                                     |
| YOL154W        | <i>ZPS1</i>  | Putative GPI-anchored protein; transcription is induced under low-zinc conditions, as mediated by the Zap1p transcription factor, and at alkaline pH Zps1p; protein coding                                                  | -5.09                               | -3.74                               |
| ORF:YPR118W    | user_defined | user_defined_node                                                                                                                                                                                                           | -3.61                               | -2.24                               |
| ORF:YPR045C    | user_defined | user_defined_node                                                                                                                                                                                                           | 2.52                                | 1.52                                |
| ORF:YPL282C    | user_defined | user_defined_node                                                                                                                                                                                                           | 2.00                                | 2.12                                |
| ORF:YPL247C    | user_defined | user_defined_node                                                                                                                                                                                                           | 5.51                                | 1.42                                |
| ORF:YPL230W    | user_defined | user_defined_node                                                                                                                                                                                                           | 10.66                               | 3.01                                |
| ORF:YPL222W    | user_defined | user_defined_node                                                                                                                                                                                                           | 4.34                                | 2.33                                |
| ORF:YPL208W    | user_defined | user_defined_node                                                                                                                                                                                                           | -1.91                               | -1.62                               |
| ORF:YPL183C    | user_defined | user_defined_node                                                                                                                                                                                                           | -1.82                               | -2.20                               |
| ORF:YPL004C    | user_defined | user_defined_node                                                                                                                                                                                                           | 5.26                                | 1.56                                |
| ORF:YOR394W    | user_defined | user_defined_node                                                                                                                                                                                                           | 1.88                                | 2.28                                |
| ORF:YOR285W    | user_defined | user_defined_node                                                                                                                                                                                                           | 2.73                                | 2.25                                |
| ORF:YOR220W    | user_defined | user_defined_node                                                                                                                                                                                                           | 3.05                                | 4.70                                |
| ORF:YOR173W    | user_defined | user_defined_node                                                                                                                                                                                                           | 10.14                               | 3.38                                |

|             |               |                                                                                                                                                                                                                                         |       |       |
|-------------|---------------|-----------------------------------------------------------------------------------------------------------------------------------------------------------------------------------------------------------------------------------------|-------|-------|
| ORF:YOR147W | user_defined  | user_defined_node                                                                                                                                                                                                                       | 1.89  | 2.37  |
| ORF:YOR054C | user_defined  | user_defined_node                                                                                                                                                                                                                       | 2.88  | 2.22  |
| ORF:YOR052C | user_defined  | user_defined_node                                                                                                                                                                                                                       | 1.49  | 1.35  |
| YBR158W     | <i>AMN1</i>   | Amn1p Protein required for daughter cell separation, multiple mitotic checkpoints, and chromosome stability; contains 12 degenerate leucine-rich repeat motifs; expression is induced by the Mitotic Exit Network (MEN); protein coding | 41.50 | 2.68  |
| YFR040W     | <i>SAP155</i> | Protein that forms a complex with the Sit4p protein phosphatase and is required for its function; member of a family of similar proteins including Sap4p, Sap185p, and Sap190p Sap155p; protein coding                                  | 2.46  | -1.20 |
| YBR302C     | <i>COS2</i>   | Cos2p Protein of unknown function, member of the DUP380 subfamily of conserved, often subtelomerically-encoded proteins; protein coding                                                                                                 | 2.77  | 1.56  |
| YNL336W     | <i>COS1</i>   | Cos1p Protein of unknown function, member of the DUP380 subfamily of conserved, often subtelomerically-encoded proteins; protein coding                                                                                                 | 2.07  | 2.11  |
| YML132W     | <i>COS3</i>   | Cos3p Protein involved in salt resistance; interacts with sodium:hydrogen antiporter Nha1p; member of the DUP380 subfamily of conserved, often subtelomerically-encoded proteins; protein coding                                        | 2.97  | 1.59  |
| YIL136W     | <i>OM45</i>   | Om45p Protein of unknown function, major constituent of the mitochondrial outer membrane; located on the outer (cytosolic) face of the outer membrane; protein coding                                                                   | 9.36  | 4.09  |
| YDR436W     | <i>PPZ2</i>   | Ppz2p Serine/threonine protein phosphatase Z, isoform of Ppz1p; involved in regulation of potassium transport, which affects osmotic stability, cell cycle progression, and halotolerance; protein coding                               | 1.69  | 1.06  |



|         |              |                                                                                                                                                                                                                                                         |       |       |
|---------|--------------|---------------------------------------------------------------------------------------------------------------------------------------------------------------------------------------------------------------------------------------------------------|-------|-------|
| YOL030W | <i>GAS5</i>  | 1,3-beta-glucanosyltransferase, has similarity to Gas1p; localizes to the cell wall Gas5p; protein coding                                                                                                                                               | 1.32  | -1.27 |
| YDR451C | <i>YHP1</i>  | One of two homeobox transcriptional repressors (see also Yox1p), that bind to Mcm1p and to early cell cycle box (ECB) elements of cell cycle regulated genes, thereby restricting ECB-mediated transcription to the M/G1 interval Yhp1p; protein coding | -2.81 | 1.02  |
| YOL084W | <i>PHM7</i>  | Phm7p Protein of unknown function, expression is regulated by phosphate levels; green fluorescent protein (GFP)-fusion protein localizes to the cell periphery and vacuole; protein coding                                                              | 24.22 | 1.74  |
| YHR076W | <i>PTC7</i>  | Mitochondrially localized type 2C protein phosphatase; expression induced by growth on ethanol and by sustained osmotic stress; possible role in carbon source utilization in low oxygen environments Ptc7p; protein coding                             | -1.83 | -1.31 |
| YFL062W | <i>COS4</i>  | Cos4p Protein of unknown function, member of the DUP380 subfamily of conserved, often subtelomerically-encoded proteins; protein coding                                                                                                                 | 2.51  | 1.76  |
| YJR127C | <i>ZMS1</i>  | Rsf2p Zinc-finger protein involved in transcriptional control of both nuclear and mitochondrial genes, many of which specify products required for glycerol-based growth, respiration, and other functions; protein coding                              | 2.08  | 1.82  |
| YOR276W | <i>CAF20</i> | Caf20p Phosphoprotein of the mRNA cap-binding complex involved in translational control, repressor of cap-dependent translation initiation, competes with eIF4G for binding to eIF4E; protein coding                                                    | -1.95 | -2.29 |
| YNL074C | <i>MLF3</i>  | Mlf3p Serine-rich protein of unknown function; overproduction suppresses the growth inhibition caused by exposure to the immunosuppressant leflunomide; protein coding                                                                                  | 1.60  | 3.17  |

|               |              |                                                                                                                                                                                                                                                 |       |       |
|---------------|--------------|-------------------------------------------------------------------------------------------------------------------------------------------------------------------------------------------------------------------------------------------------|-------|-------|
| YER150W       | <i>SPII</i>  | GPI-anchored, serine/threonine rich cell wall protein of unknown function; basal expression requires Msn2p/Msn4p; expression is induced under conditions of stress and during the diauxic shift; similar to Sed1p Spi1p; protein coding         | 10.46 | 1.79  |
| YGR295C       | <i>COS6</i>  | Cos6p Protein of unknown function, member of the DUP380 subfamily of conserved, often subtelomerically-encoded proteins; protein coding                                                                                                         | 2.01  | 2.76  |
| YLR183C       | <i>TOS4</i>  | Tos4p Transcription factor that binds to a number of promoter regions, particularly promoters of some genes involved in pheromone response and cell cycle; potential Cdc28p substrate; expression is induced in G1 by bound SBF; protein coding | -2.48 | -1.26 |
| BUD28         | user_defined | user_defined_node                                                                                                                                                                                                                               | -2.05 | -1.29 |
| IMD1          | user_defined | user_defined_node                                                                                                                                                                                                                               | -2.88 | -3.23 |
| ORF:YAL061W   | user_defined | user_defined_node                                                                                                                                                                                                                               | 8.92  | 10.34 |
| ORF:YBL009W   | user_defined | user_defined_node                                                                                                                                                                                                                               | -2.12 | 1.27  |
| ORF:YBL029C-A | user_defined | user_defined_node                                                                                                                                                                                                                               | 1.69  | 1.24  |
| ORF:YBL064C   | user_defined | user_defined_node                                                                                                                                                                                                                               | 7.09  | 3.08  |
| ORF:YBL108C-A | user_defined | user_defined_node                                                                                                                                                                                                                               | 1.58  | 2.48  |
| ORF:YBL112C   | user_defined | user_defined_node                                                                                                                                                                                                                               | 1.74  | 3.95  |
| ORF:YBR052C   | user_defined | user_defined_node                                                                                                                                                                                                                               | 2.53  | 1.91  |
| ORF:YBR116C   | user_defined | user_defined_node                                                                                                                                                                                                                               | 34.48 | 1.61  |
| ORF:YBR187W   | user_defined | user_defined_node                                                                                                                                                                                                                               | -2.04 | -2.35 |
| ORF:YBR261C   | user_defined | user_defined_node                                                                                                                                                                                                                               | -2.47 | -1.38 |
| ORF:YCL021W-A | user_defined | user_defined_node                                                                                                                                                                                                                               | 2.86  | -1.16 |
| ORF:YCR099C   | user_defined | user_defined_node                                                                                                                                                                                                                               | 1.63  | 1.39  |

|             |              |                                                                                                                                                                                                                                                                     |       |       |
|-------------|--------------|---------------------------------------------------------------------------------------------------------------------------------------------------------------------------------------------------------------------------------------------------------------------|-------|-------|
| ORF:YDL025C | user_defined | user_defined_node                                                                                                                                                                                                                                                   | 3.07  | 4.15  |
| ORF:YDL124W | user_defined | user_defined_node                                                                                                                                                                                                                                                   | 2.54  | 2.61  |
| ORF:YDL187C | user_defined | user_defined_node                                                                                                                                                                                                                                                   | -2.05 | 1.35  |
| ORF:YDL204W | user_defined | user_defined_node                                                                                                                                                                                                                                                   | 18.67 | 2.80  |
| ORF:YDR070C | user_defined | user_defined_node                                                                                                                                                                                                                                                   | 6.50  | 3.35  |
| ORF:YDR117C | user_defined | user_defined_node                                                                                                                                                                                                                                                   | -1.68 | 1.88  |
| ORF:YDR479C | user_defined | user_defined_node                                                                                                                                                                                                                                                   | 1.83  | -1.21 |
| YGR236C     | <i>SPG1</i>  | Protein required for survival at high temperature during stationary phase; not required for growth on nonfermentable carbon sources; the authentic, non-tagged protein is detected in highly purified mitochondria in high-throughput studies Spg1p; protein coding | 5.34  | 1.18  |
| ORF:YDR533C | user_defined | user_defined_node                                                                                                                                                                                                                                                   | 6.99  | 1.59  |
| YDL223C     | <i>HBT1</i>  | Hbt1p Substrate of the Hub1p ubiquitin-like protein that localizes to the shmoo tip (mating projection); mutants are defective for mating projection formation, thereby implicating Hbt1p in polarized cell morphogenesis; protein coding                           | 7.30  | 2.07  |
| ORF:YEL067C | user_defined | user_defined_node                                                                                                                                                                                                                                                   | -3.02 | 1.64  |
| ORF:YER030W | user_defined | user_defined_node                                                                                                                                                                                                                                                   | -1.69 | 1.20  |
| ORF:YFL030W | user_defined | user_defined_node                                                                                                                                                                                                                                                   | 2.33  | 1.57  |
| ORF:YFR017C | user_defined | user_defined_node                                                                                                                                                                                                                                                   | 6.03  | 1.49  |
| ORF:YGL039W | user_defined | user_defined_node                                                                                                                                                                                                                                                   | -2.62 | -1.29 |
| ORF:YGL045W | user_defined | user_defined_node                                                                                                                                                                                                                                                   | 1.83  | 2.81  |
| ORF:YGL088W | user_defined | user_defined_node                                                                                                                                                                                                                                                   | 1.88  | 4.68  |

|             |              |                   |       |       |
|-------------|--------------|-------------------|-------|-------|
| ORF:YGL102C | user_defined | user_defined_node | -3.21 | -1.77 |
| ORF:YGR043C | user_defined | user_defined_node | 10.55 | 4.48  |
| ORF:YGR086C | user_defined | user_defined_node | 4.02  | 10.06 |
| ORF:YGR111W | user_defined | user_defined_node | 2.48  | 1.24  |
| ORF:YGR130C | user_defined | user_defined_node | 2.37  | 1.84  |
| ORF:YGR151C | user_defined | user_defined_node | -2.03 | -1.44 |
| ORF:YGR201C | user_defined | user_defined_node | 3.50  | 1.27  |
| ORF:YHL008C | user_defined | user_defined_node | 3.05  | 1.62  |
| ORF:YHL035C | user_defined | user_defined_node | 2.04  | 2.02  |
| ORF:YHL046C | user_defined | user_defined_node | 2.06  | 2.73  |
| ORF:YHR003C | user_defined | user_defined_node | -1.97 | -1.85 |
| ORF:YHR080C | user_defined | user_defined_node | 2.00  | 1.17  |
| ORF:YHR087W | user_defined | user_defined_node | 12.35 | 1.69  |
| ORF:YHR097C | user_defined | user_defined_node | 3.32  | 2.08  |
| ORF:YHR121W | user_defined | user_defined_node | -2.84 | -1.61 |
| ORF:YHR138C | user_defined | user_defined_node | 3.01  | 2.45  |
| ORF:YHR149C | user_defined | user_defined_node | -1.97 | -1.70 |
| ORF:YIL077C | user_defined | user_defined_node | 2.63  | 2.69  |
| ORF:YIL158W | user_defined | user_defined_node | -2.40 | -1.32 |
| ORF:YIL176C | user_defined | user_defined_node | 1.86  | 2.48  |
| ORF:YIR041W | user_defined | user_defined_node | 1.75  | 2.23  |
| ORF:YJL016W | user_defined | user_defined_node | 3.15  | 1.58  |
| ORF:YJL048C | user_defined | user_defined_node | 2.09  | 1.40  |

|             |              |                   |       |       |
|-------------|--------------|-------------------|-------|-------|
| ORF:YJL122W | user_defined | user_defined_node | -1.99 | -1.42 |
| ORF:YJL142C | user_defined | user_defined_node | 4.95  | 1.77  |
| ORF:YJL144W | user_defined | user_defined_node | 5.79  | 1.44  |
| ORF:YJR039W | user_defined | user_defined_node | 2.03  | 2.84  |
| ORF:YKL027W | user_defined | user_defined_node | -1.61 | -1.55 |
| ORF:YKL091C | user_defined | user_defined_node | 3.84  | 1.71  |
| ORF:YKL151C | user_defined | user_defined_node | 5.32  | 3.72  |
| ORF:YKL224C | user_defined | user_defined_node | 1.79  | 2.67  |
| ORF:YKR049C | user_defined | user_defined_node | 2.99  | 1.82  |
| ORF:YLL020C | user_defined | user_defined_node | 3.29  | 2.09  |
| ORF:YLL029W | user_defined | user_defined_node | 3.05  | 2.25  |
| ORF:YLR040C | user_defined | user_defined_node | -1.95 | -1.48 |
| ORF:YLR126C | user_defined | user_defined_node | -2.35 | 1.43  |
| ORF:YLR149C | user_defined | user_defined_node | 6.56  | 1.99  |
| ORF:YLR270W | user_defined | user_defined_node | 4.29  | 3.13  |
| ORF:YLR312C | user_defined | user_defined_node | 6.35  | 19.21 |
| ORF:YLR324W | user_defined | user_defined_node | 1.64  | 1.21  |
| ORF:YLR345W | user_defined | user_defined_node | 4.21  | 2.19  |
| ORF:YLR454W | user_defined | user_defined_node | 2.58  | 1.76  |
| ORF:YML117W | user_defined | user_defined_node | 2.16  | 2.04  |
| ORF:YML125C | user_defined | user_defined_node | -2.09 | -2.03 |
| ORF:YMR009W | user_defined | user_defined_node | 1.89  | 4.00  |
| ORF:YMR031C | user_defined | user_defined_node | 3.06  | 1.59  |

|               |              |                                                                                                                                                                                      |       |       |
|---------------|--------------|--------------------------------------------------------------------------------------------------------------------------------------------------------------------------------------|-------|-------|
| ORF:YMR041C   | user_defined | user_defined_node                                                                                                                                                                    | 1.98  | 7.89  |
| ORF:YMR090W   | user_defined | user_defined_node                                                                                                                                                                    | 8.00  | 7.29  |
| ORF:YMR103C   | user_defined | user_defined_node                                                                                                                                                                    | 3.95  | 4.30  |
| ORF:YMR110C   | user_defined | user_defined_node                                                                                                                                                                    | 3.03  | 1.43  |
| ORF:YMR130W   | user_defined | user_defined_node                                                                                                                                                                    | -1.83 | -1.51 |
| ORF:YMR140W   | user_defined | user_defined_node                                                                                                                                                                    | 1.90  | 1.43  |
| ORF:YMR158C-B | user_defined | user_defined_node                                                                                                                                                                    | 3.18  | 1.13  |
| ORF:YMR173W-A | user_defined | user_defined_node                                                                                                                                                                    | 3.01  | 1.82  |
| ORF:YMR181C   | user_defined | user_defined_node                                                                                                                                                                    | 1.92  | 3.63  |
| ORF:YMR188C   | user_defined | user_defined_node                                                                                                                                                                    | 2.31  | 1.26  |
| ORF:YMR196W   | user_defined | user_defined_node                                                                                                                                                                    | 6.29  | 5.04  |
| ORF:YMR262W   | user_defined | user_defined_node                                                                                                                                                                    | 1.88  | 1.58  |
| ORF:YMR304C-A | user_defined | user_defined_node                                                                                                                                                                    | -4.73 | -1.99 |
| ORF:YNL080C   | user_defined | user_defined_node                                                                                                                                                                    | 1.43  | 3.26  |
| ORF:YNL115C   | user_defined | user_defined_node                                                                                                                                                                    | 3.02  | 1.90  |
| ORF:YNL134C   | user_defined | user_defined_node                                                                                                                                                                    | 4.30  | 2.43  |
| ORF:YNL156C   | user_defined | user_defined_node                                                                                                                                                                    | 2.48  | 1.21  |
| ORF:YNL195C   | user_defined | user_defined_node                                                                                                                                                                    | 11.68 | 1.19  |
| ORF:YNR047W   | user_defined | user_defined_node                                                                                                                                                                    | 2.78  | 1.23  |
| ORF:YOL019W   | user_defined | user_defined_node                                                                                                                                                                    | -2.33 | 2.55  |
| YLR093C       | <i>NYV1</i>  | Nyv1p v-SNARE component of the vacuolar SNARE complex involved in vesicle fusion; inhibits ATP-dependent Ca(2+) transport activity of Pmc1p in the vacuolar membrane; protein coding | 1.71  | 2.72  |

|             |              |                                                                                                                    |       |       |
|-------------|--------------|--------------------------------------------------------------------------------------------------------------------|-------|-------|
| ORF:YOL083W | user_defined | user_defined_node                                                                                                  | 2.09  | 1.43  |
| ORF:YOL087C | user_defined | user_defined_node                                                                                                  | 2.09  | 1.61  |
| YMR215W     | <i>GAS3</i>  | Gas3p Putative 1,3-beta-glucanosyltransferase, has similarity to Gas1p; localizes to the cell wall; protein coding | -2.25 | -1.50 |
| ORF:YOR019W | user_defined | user_defined_node                                                                                                  | 5.11  | 4.73  |
| ORF:YOR051C | user_defined | user_defined_node                                                                                                  | -1.88 | -2.16 |
| YDL024C     | <i>DIA3</i>  | Dia3p Protein of unknown function, involved in invasive and pseudohyphal growth; protein coding                    | 3.91  | 1.86  |
